# Supplementary material for: Rational design and synthesis of novel phenyltriazole derivatives targeting MRSA cell wall biosynthesis
Source: Royal Society of Chemistry journal article supplement (doi:10.1039/d4ra07367c), 2024-01-01
Supplement: d4ra07367c1.pdf [file d4ra07367c1.pdf]

## Supporting information

### Rational Design and Synthesis of Novel Phenyltriazole Derivatives Targeting MRSA Cell Wall Biosynthesis

Mohamed M. Elsebaei<sup>1,\*</sup>, Hany G. Ezzat<sup>1</sup>, Ahmed M. Helal<sup>1</sup>, Mohamed H. El-Shershaby<sup>1</sup>,  
Mohammed S. Abdulrahman<sup>2</sup>, Alsedawy M.<sup>2</sup>, Ahmed K. B. Aljohani<sup>3</sup>, Mohammed  
Almaghrabi<sup>3</sup>, Marwa Alsulaimany<sup>3</sup>, Basmah Almohaywi<sup>4</sup>, Read Alghamdi<sup>3</sup>, Samar F. Miski<sup>5</sup>,  
Arafa Musa<sup>6</sup>, Hany E. A. Ahmed<sup>1\*</sup>

<sup>1</sup> Pharmaceutical Chemistry Department, Faculty of Pharmacy, Al-Azhar University,  
Nasr City 11884, Cairo, Egypt

<sup>2</sup> Microbiology and Immunology Department, Faculty of Pharmacy, Al-Azhar  
University, Nasr City 11884, Cairo, Egypt

<sup>3</sup> Pharmacognosy and Pharmaceutical Chemistry Department, Pharmacy College,  
Taibah University, Al-Madinah Al-Munawarah 41477, Saudi Arabia

<sup>4</sup> Department of Pharmaceutical Chemistry, College of Pharmacy, King Khalid  
University, Abha 61421 Saudi Arabia

<sup>5</sup> Department of Pharmacology and Toxicology, College of Pharmacy, Taibah  
University Medina 42353 Saudi Arabia.

<sup>6</sup> Department of Pharmacognosy, College of Pharmacy, Jouf University, Sakaka, Aljouf 72341,  
Saudi Arabia

\*Corresponding author.

*E-mail address:* [m.elsebaei@azhar.edu.eg](mailto:m.elsebaei@azhar.edu.eg) , [heahmad@azhar.edu.eg](mailto:heahmad@azhar.edu.eg)

\*

## **Table of Contents**

NMR and HPLC spectra

S3-S42

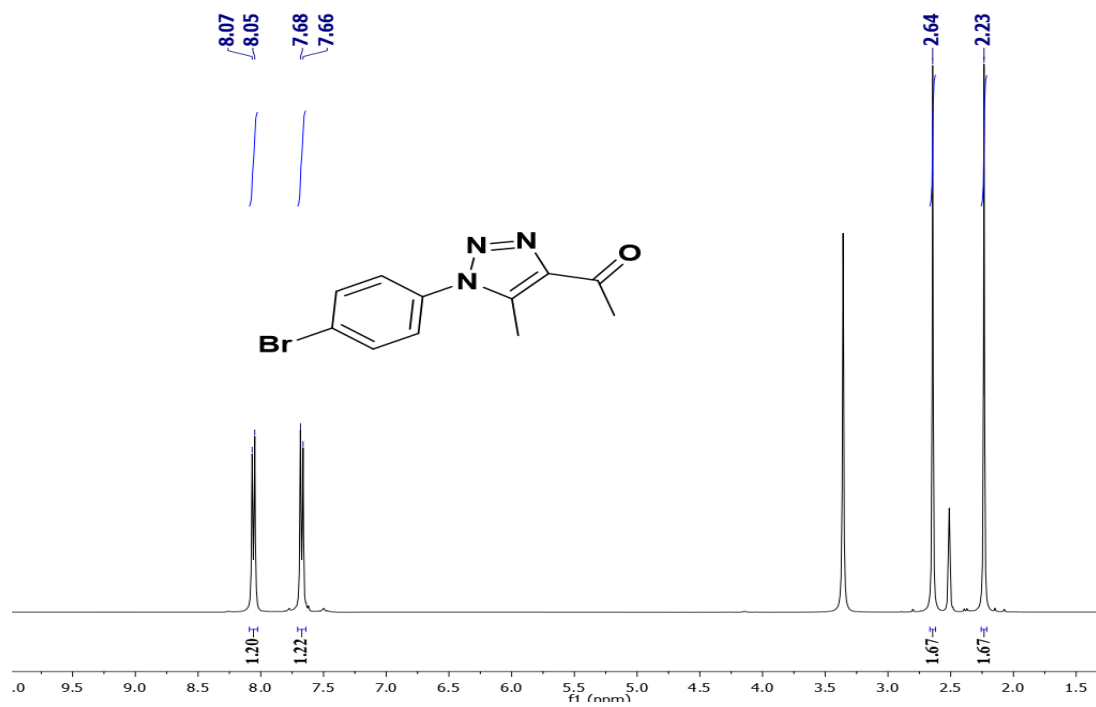

<sup>1</sup>H NMR of compound 4

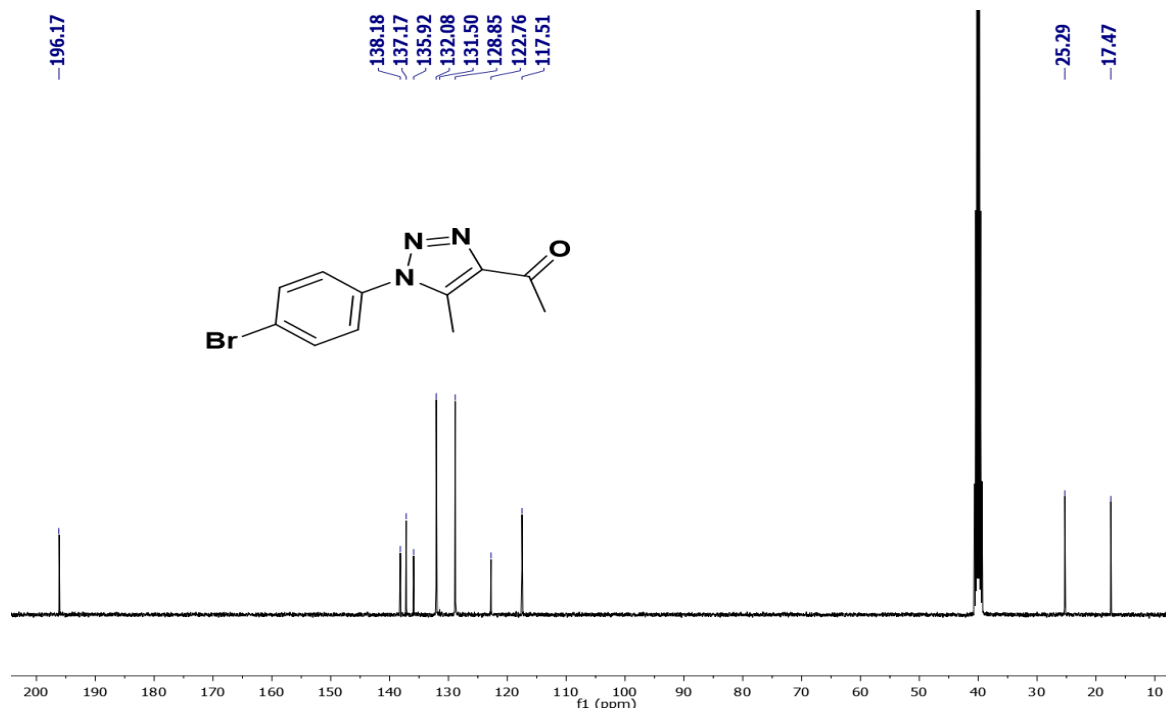

<sup>13</sup>C NMR of compound 4

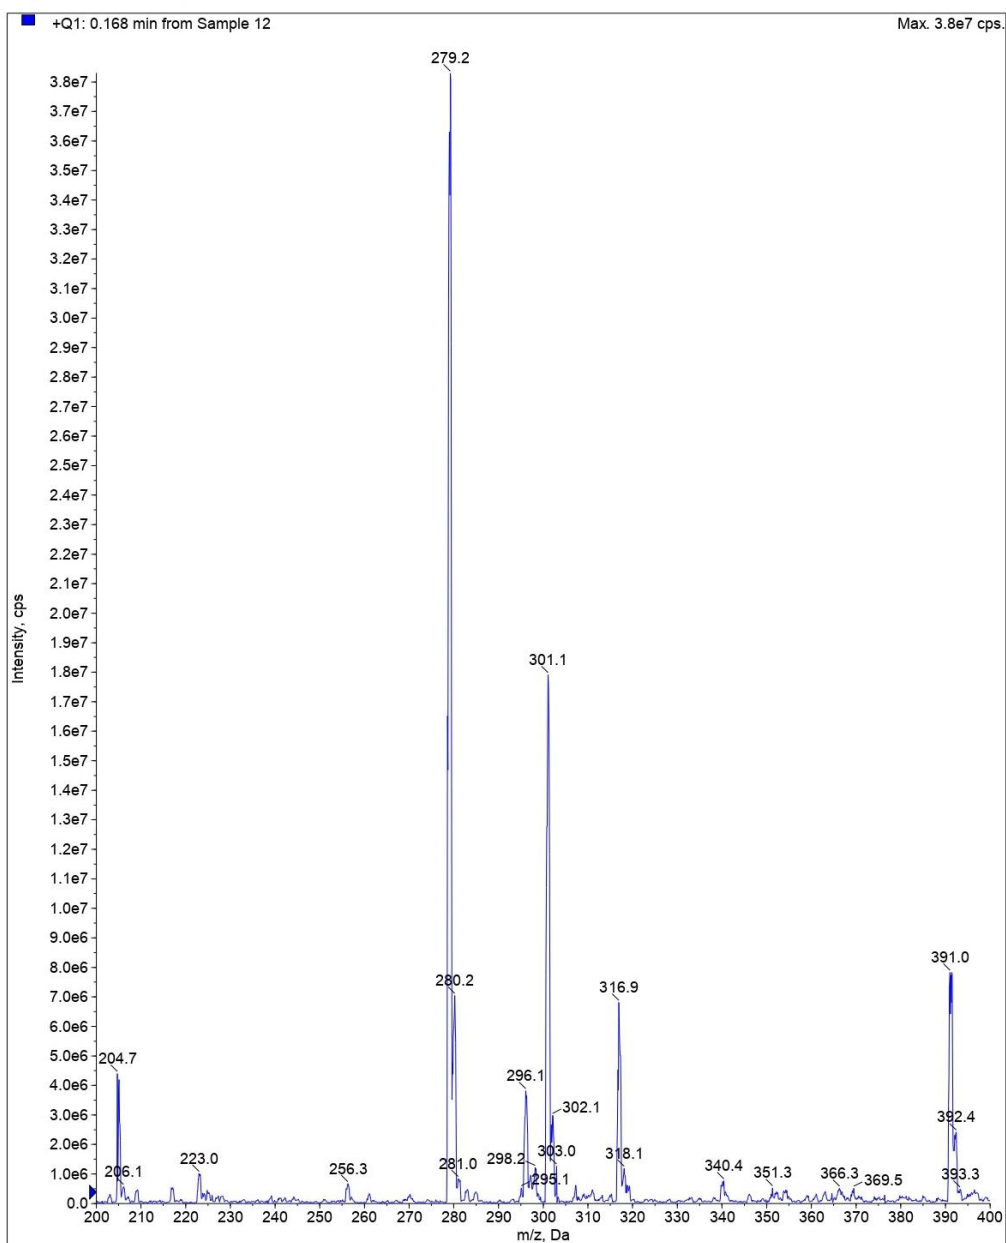

**Mass of Compound 4**

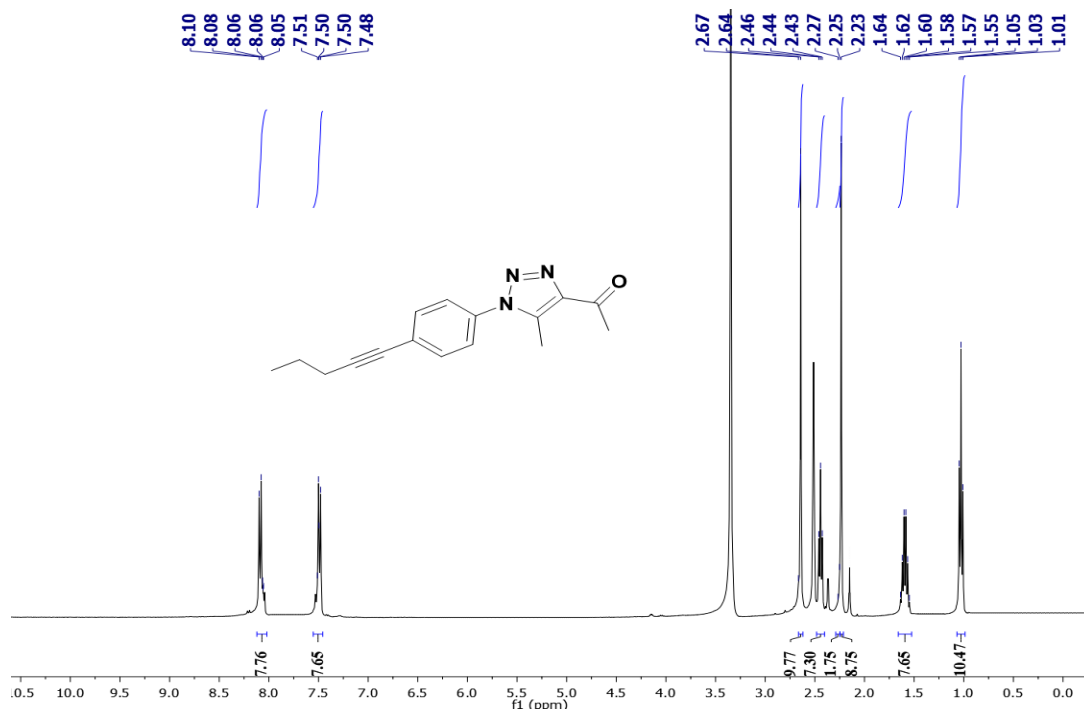

**<sup>1</sup>H NMR of compound 5**

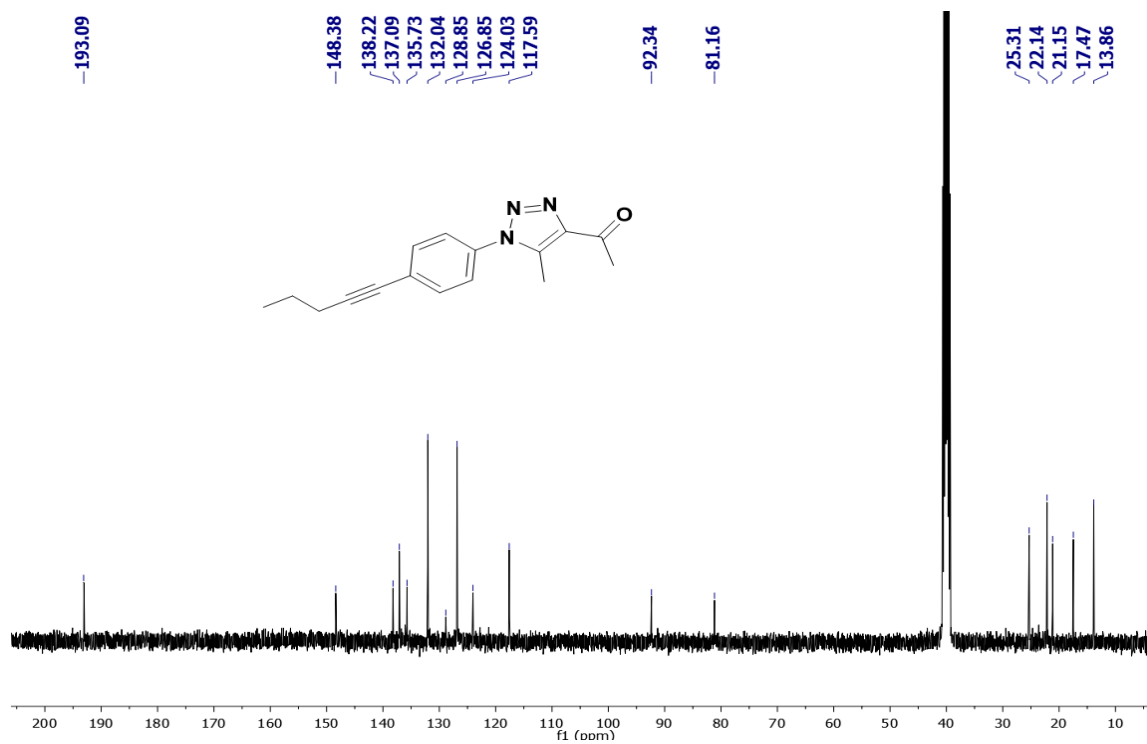

**<sup>13</sup>C NMR of compound 5**

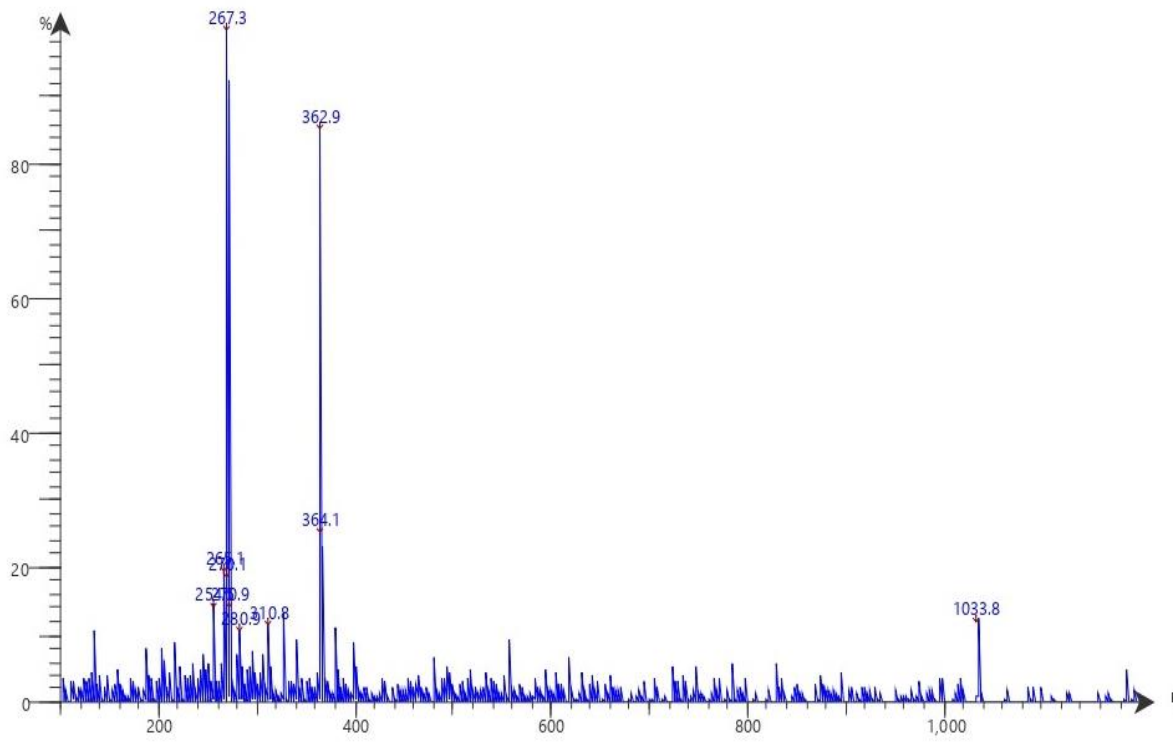

*Mass of compound 5*

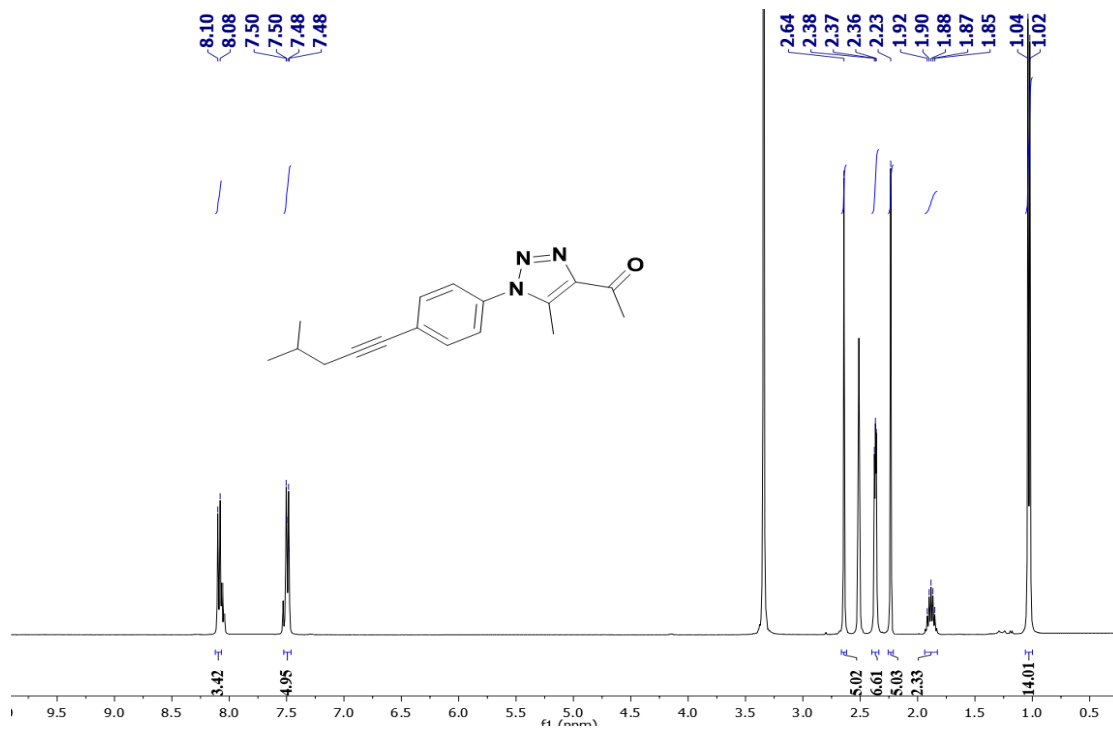

<sup>1</sup>H NMR of compound 6

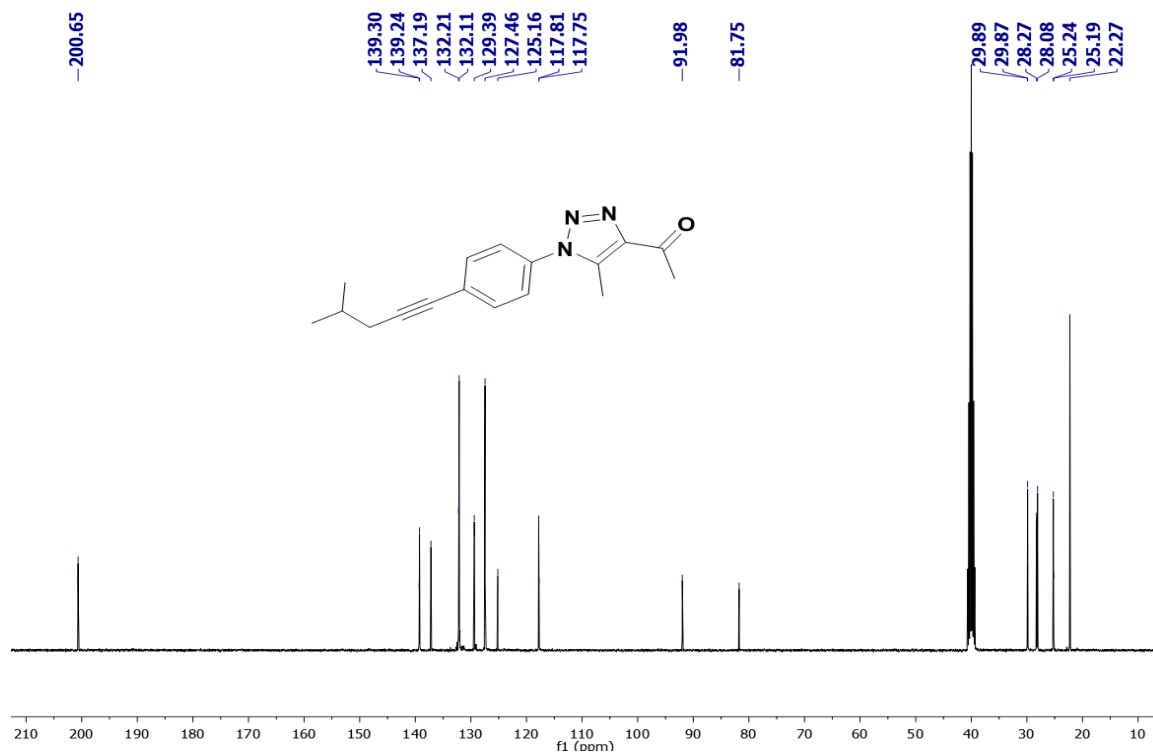

<sup>13</sup>C NMR of compound 6

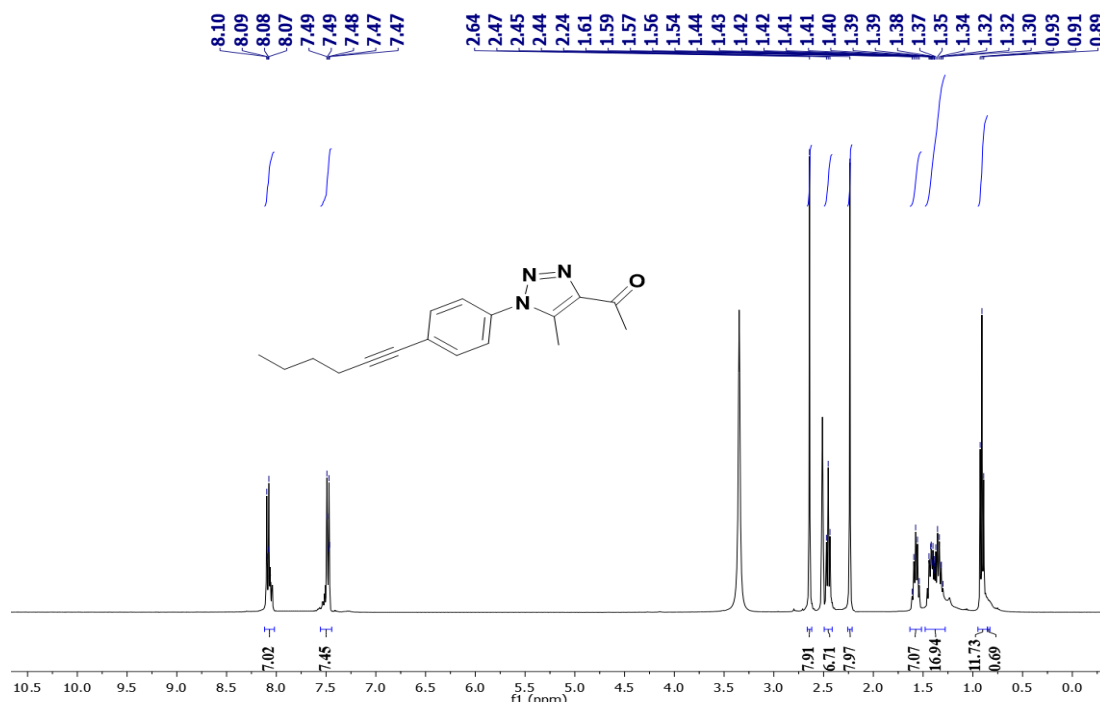

<sup>1</sup>H NMR of compound 7

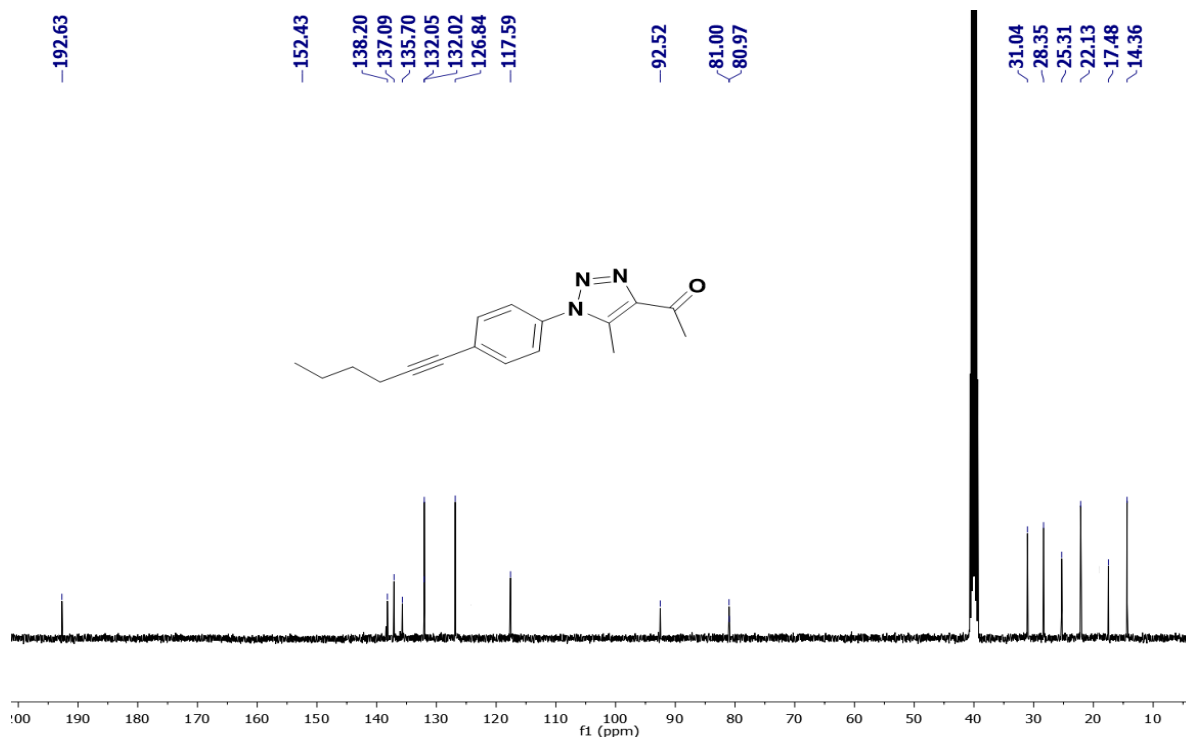

<sup>13</sup>C NMR of compound 7



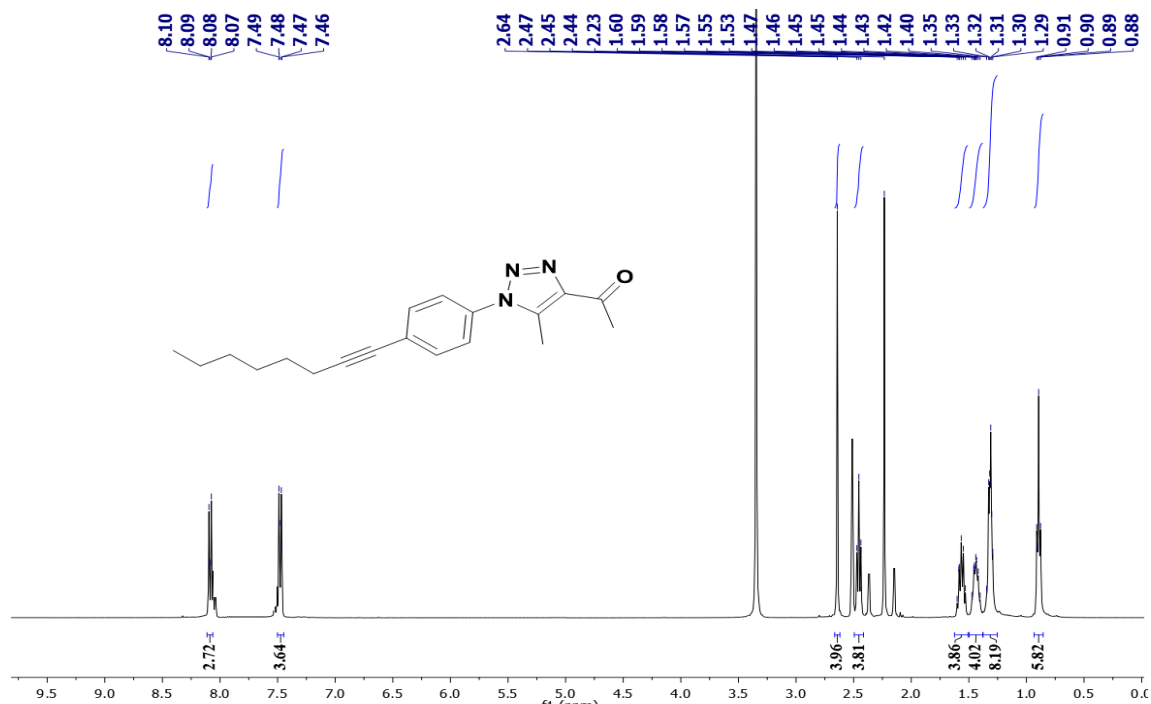

<sup>1</sup>H NMR of compound 8

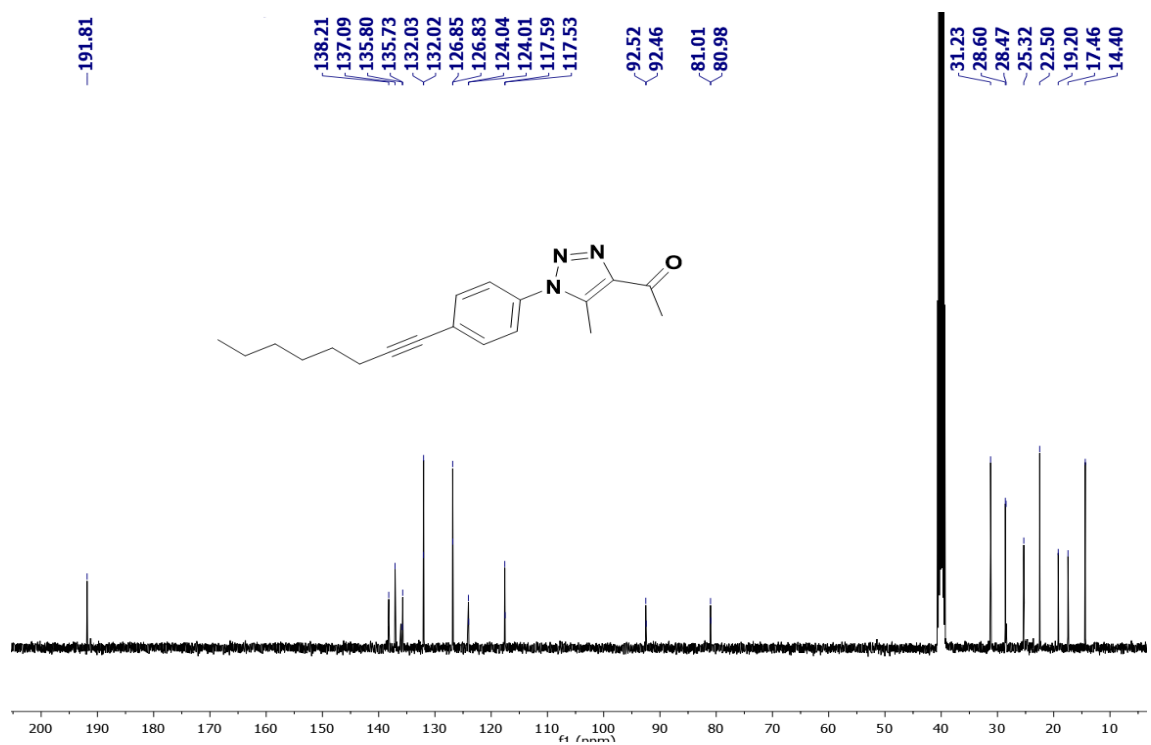

<sup>13</sup>C NMR of compound 8

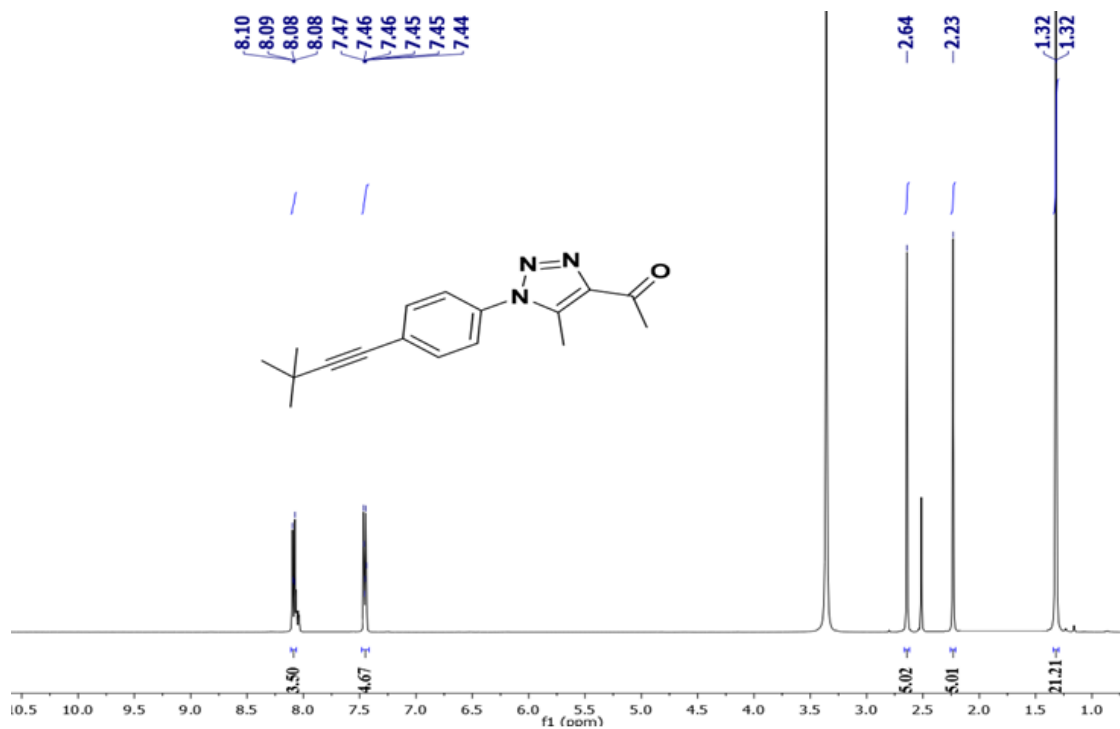

<sup>1</sup>H NMR of compound 9

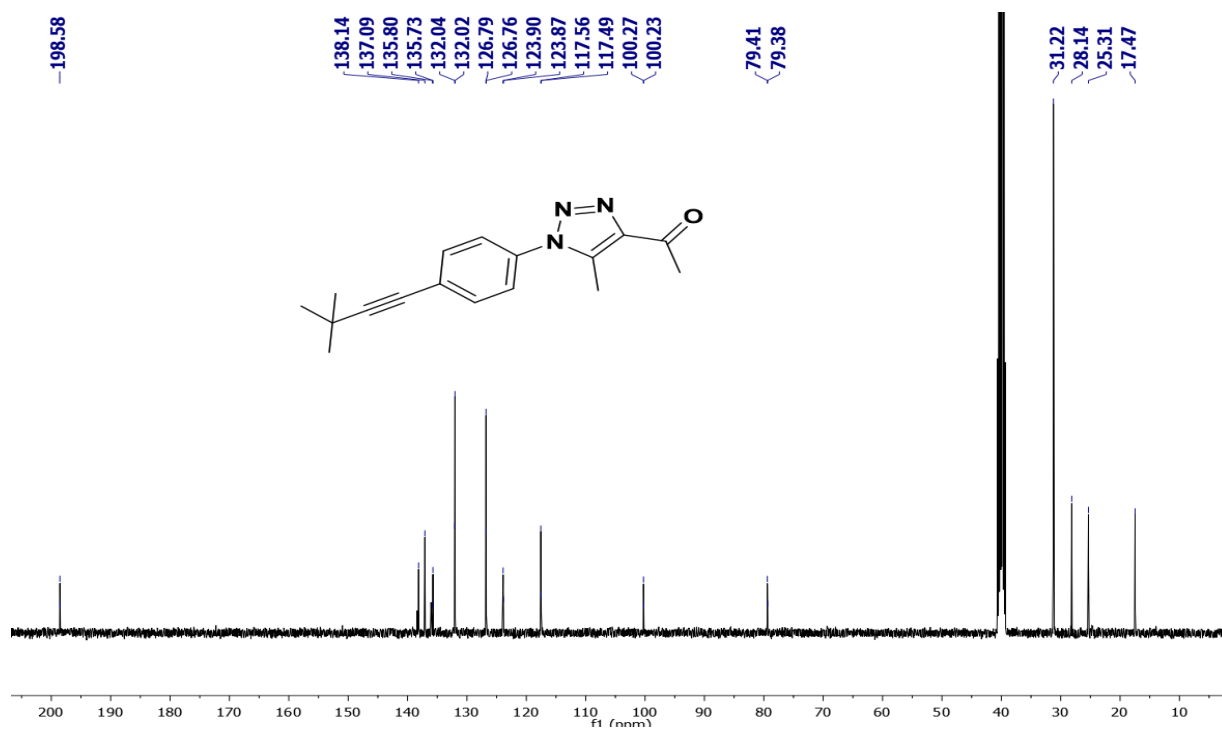

<sup>13</sup>C NMR of compound 9

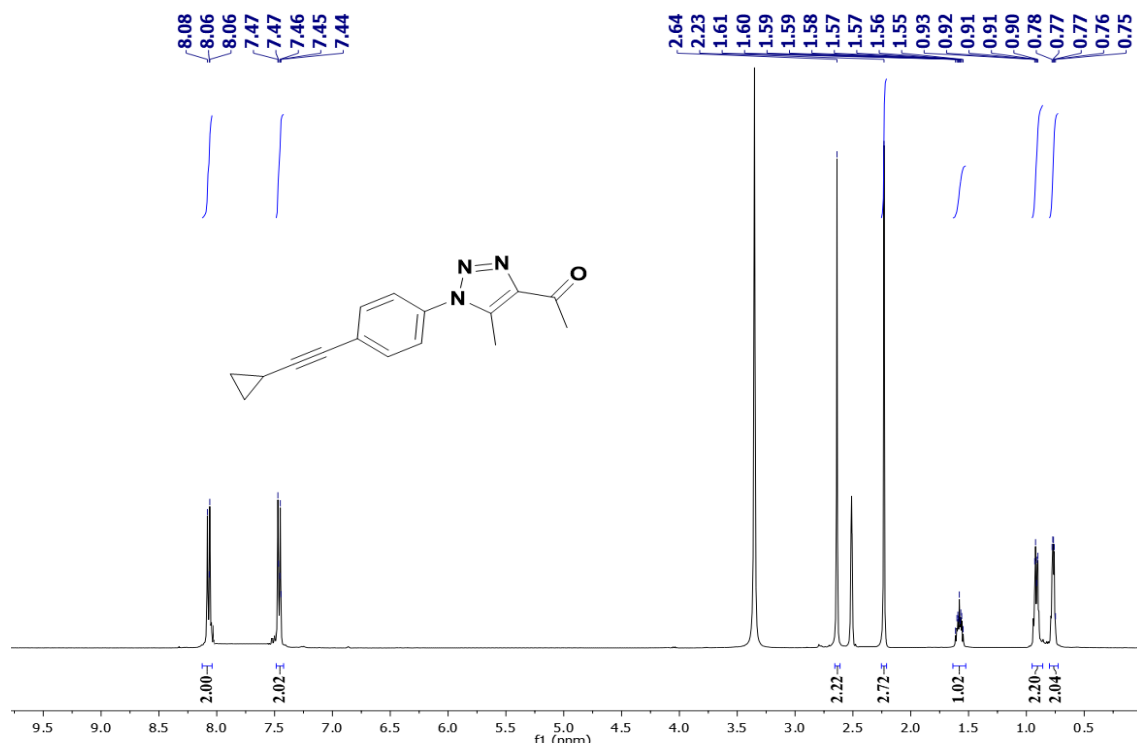

<sup>1</sup>H NMR of compound 10

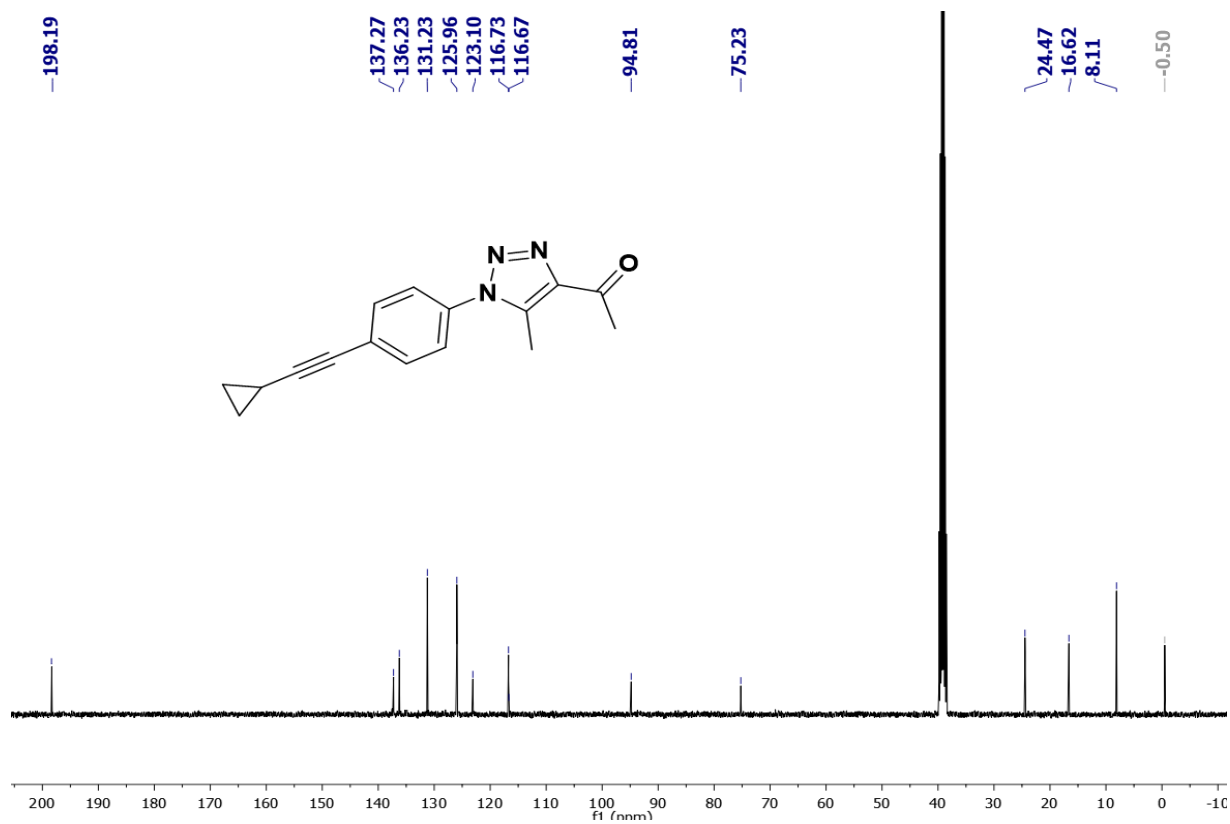

<sup>13</sup>C NMR of compound 10

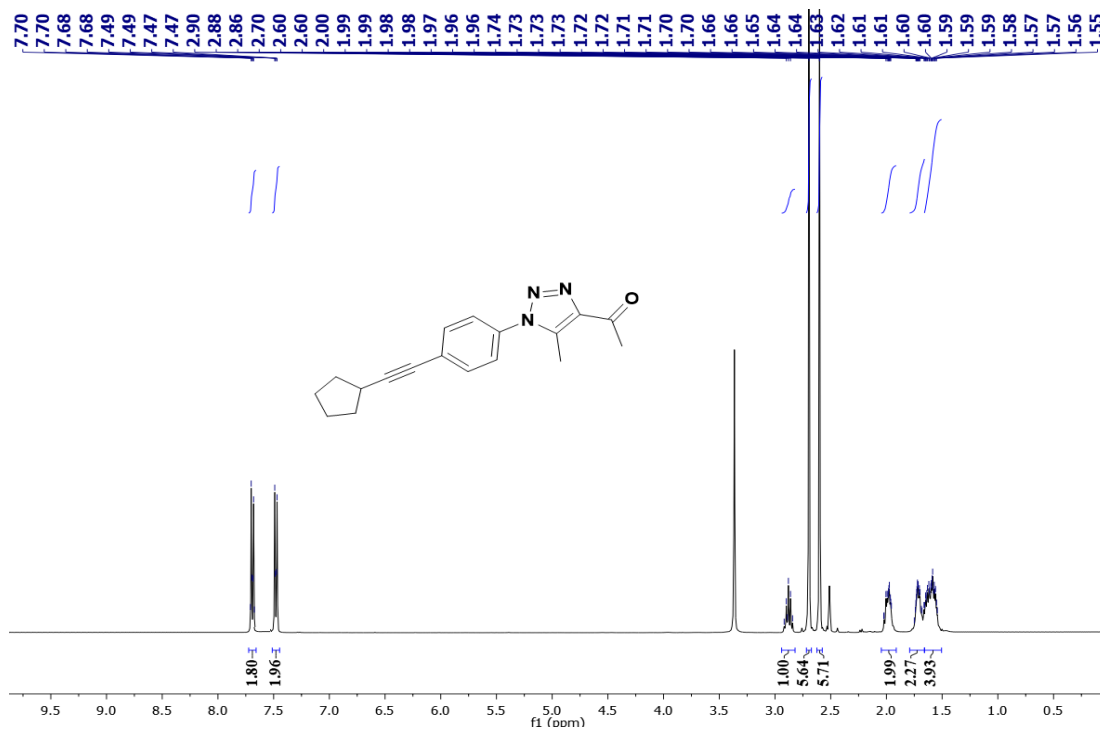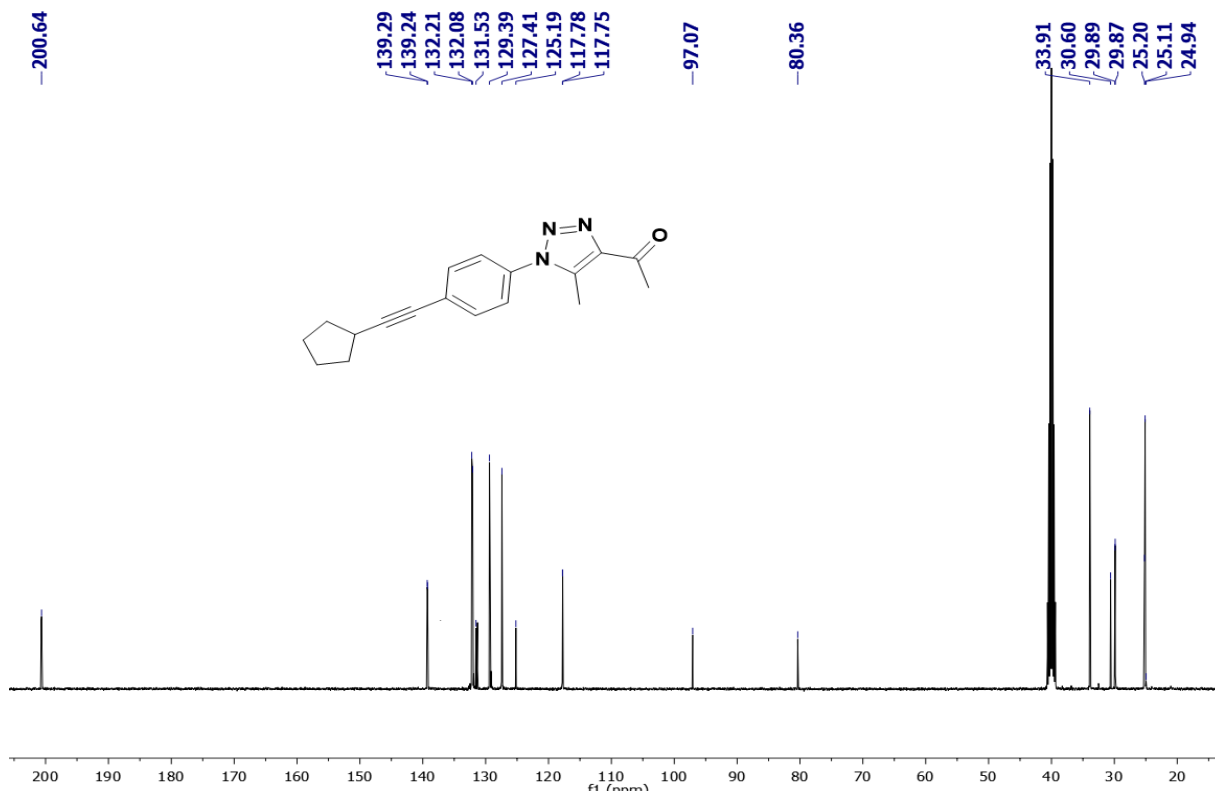

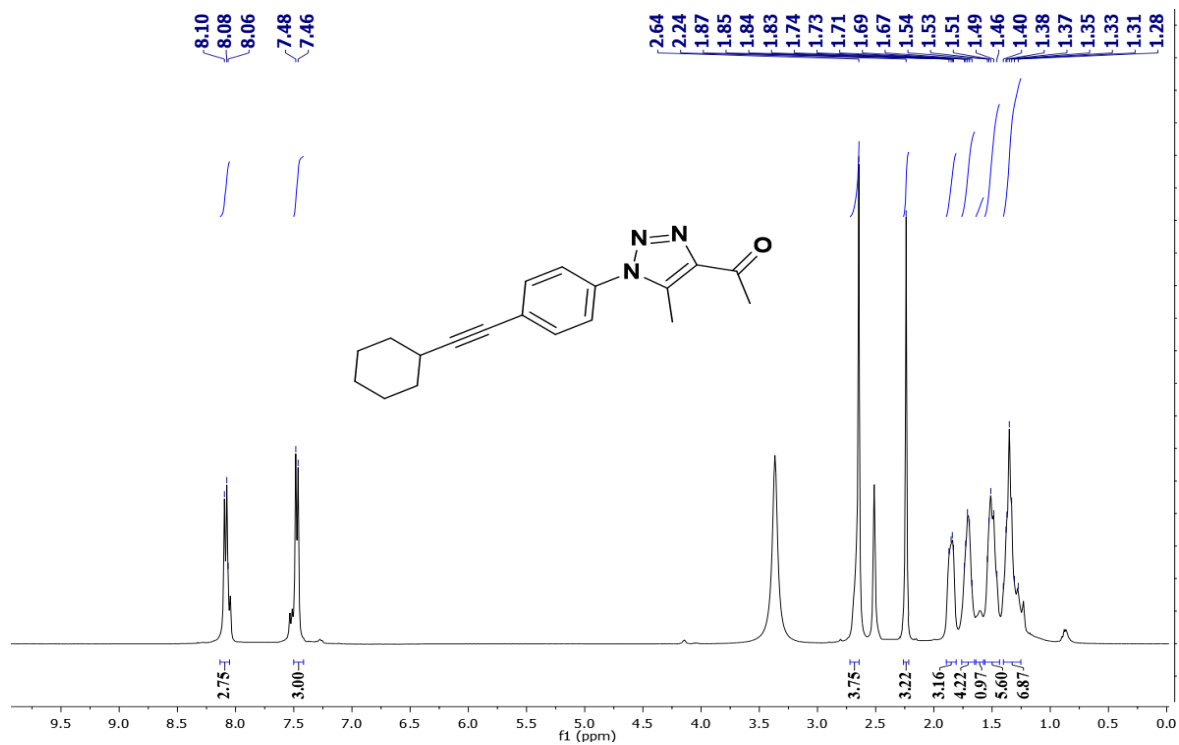

<sup>1</sup>H NMR of compound 12

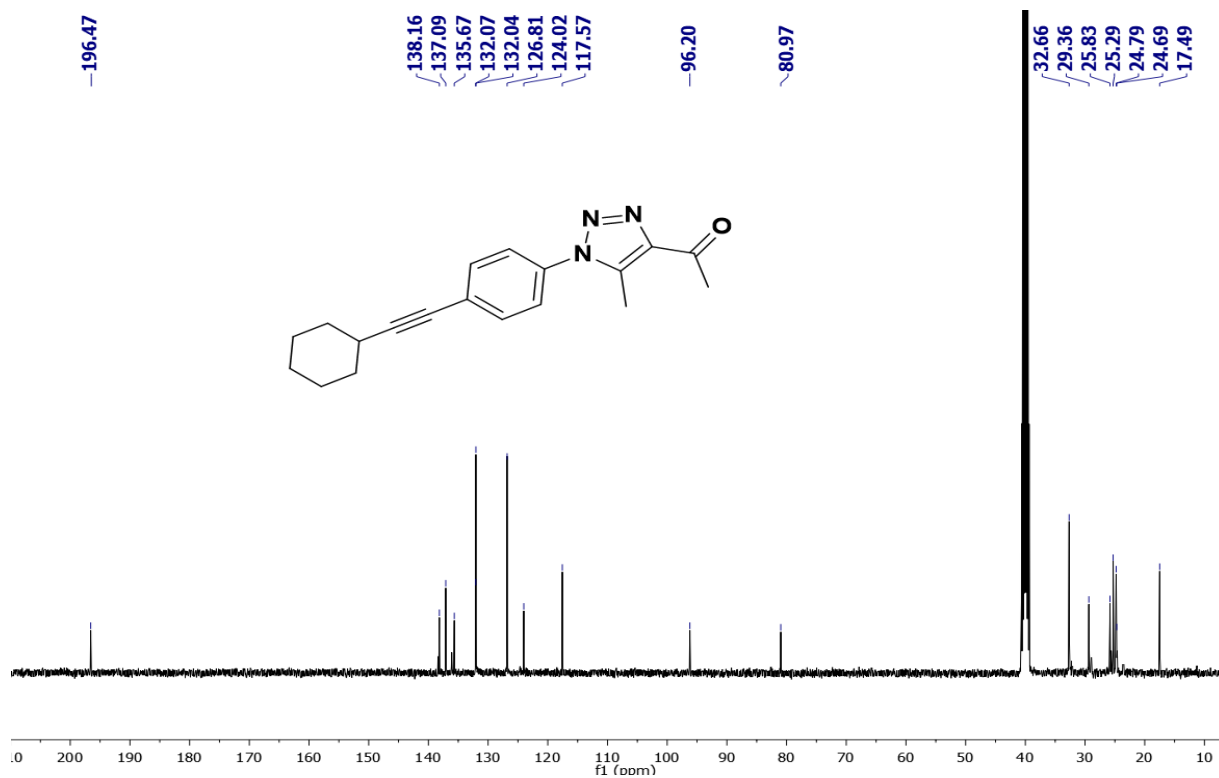

<sup>13</sup>C NMR of compound 12

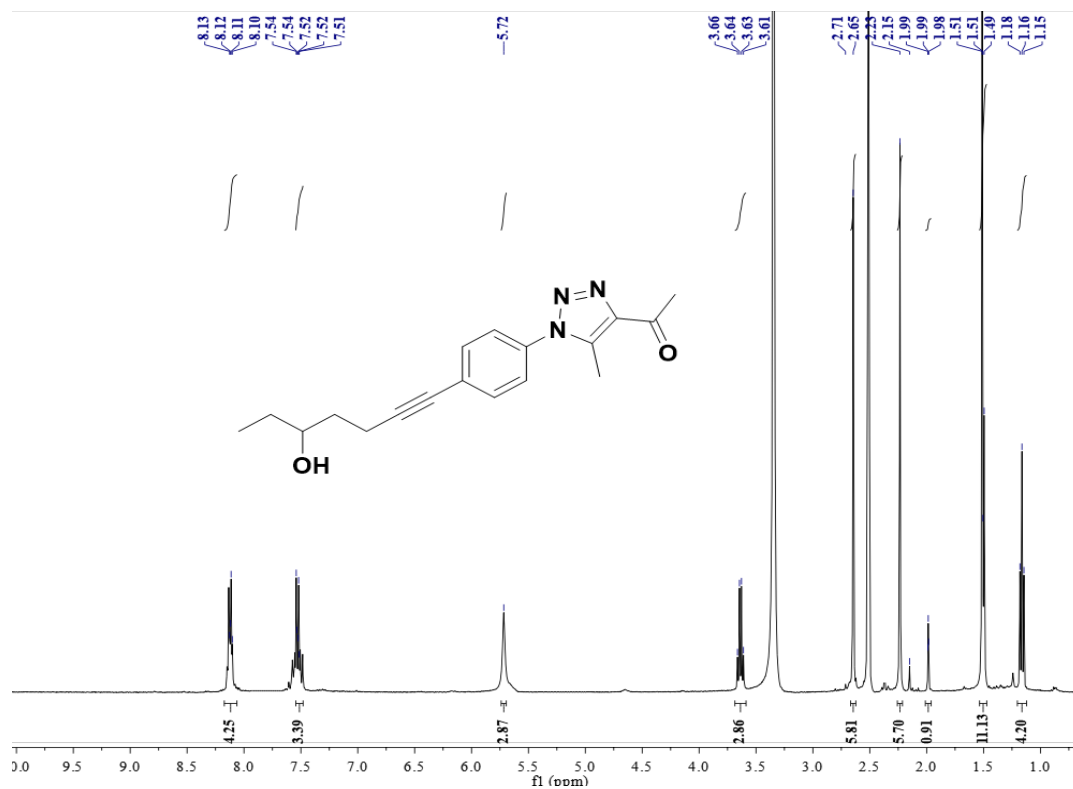

**<sup>1</sup>H NMR of compound 13**

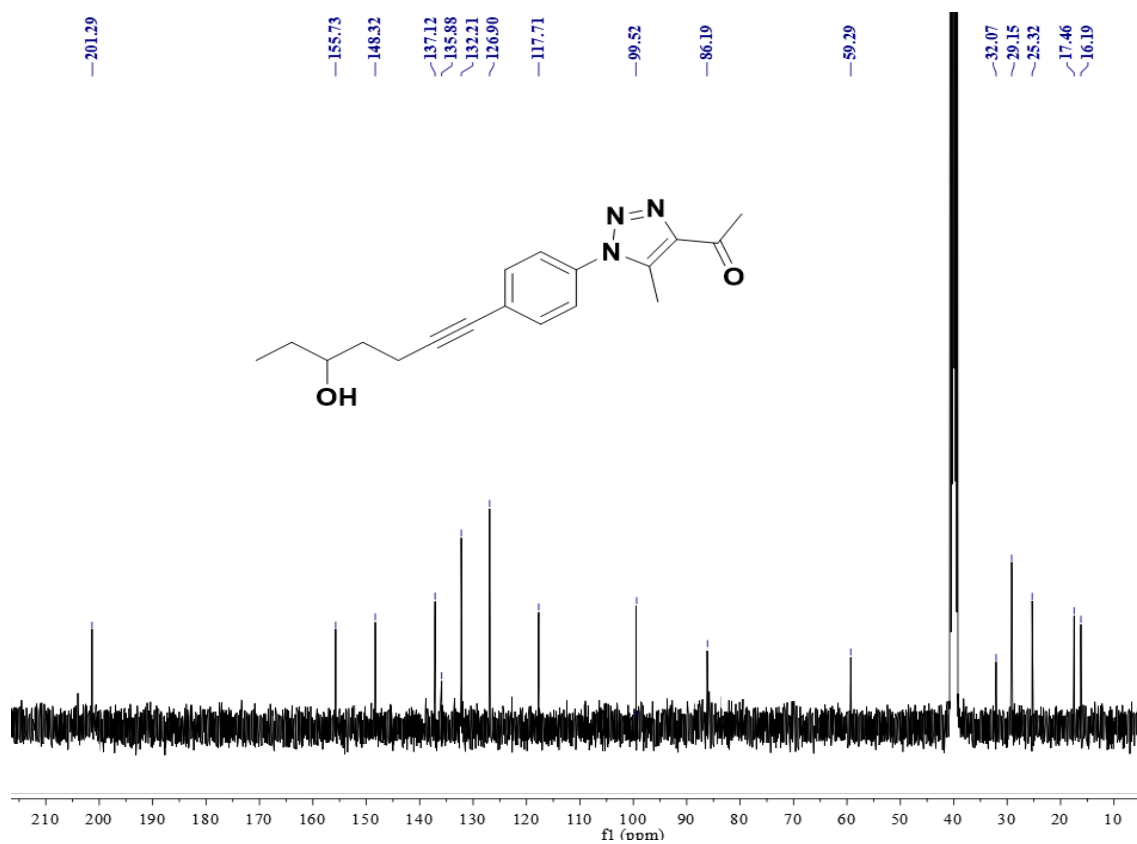

**<sup>13</sup>C NMR of compound 13**

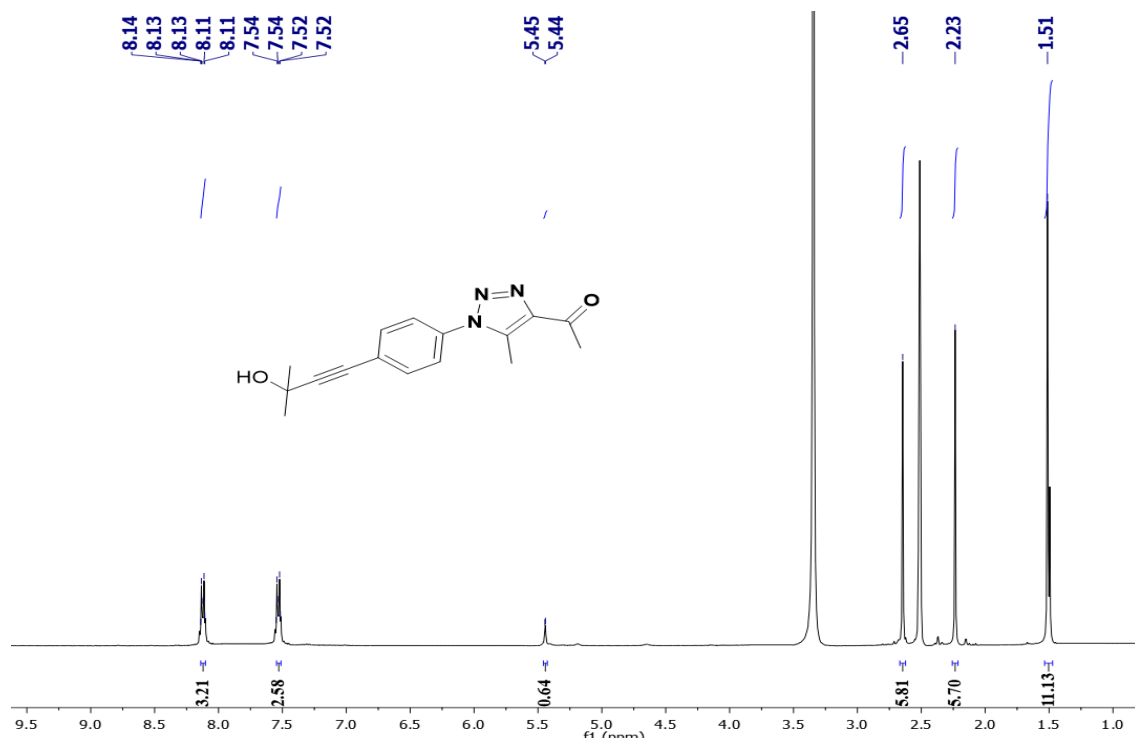

<sup>1</sup>H NMR of compound 14

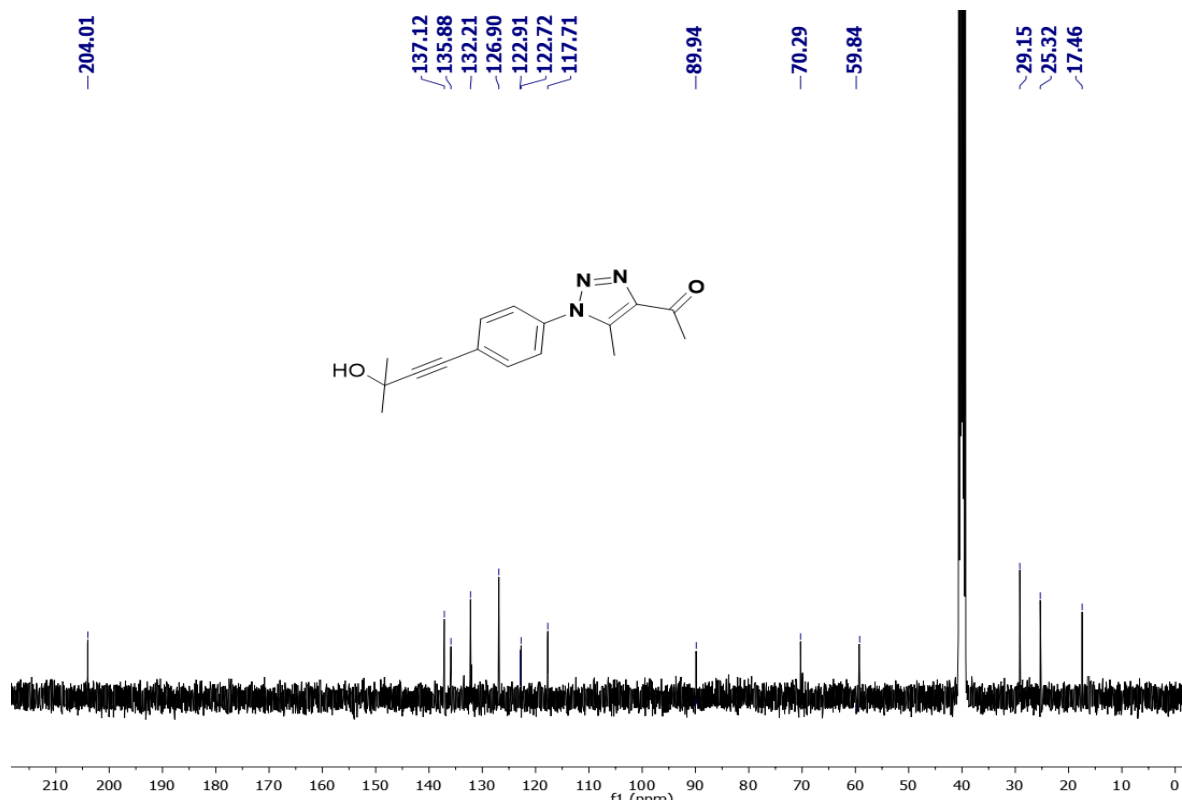

<sup>13</sup>C NMR of compound 14

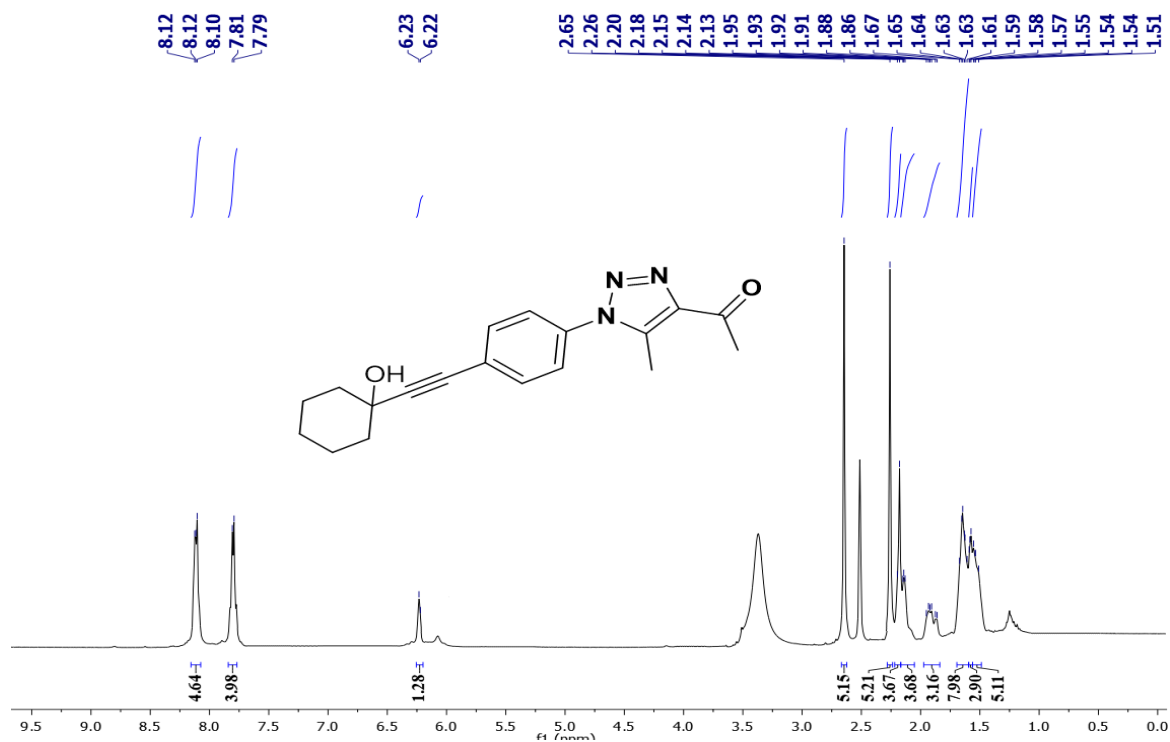

<sup>1</sup>H NMR of compound 15

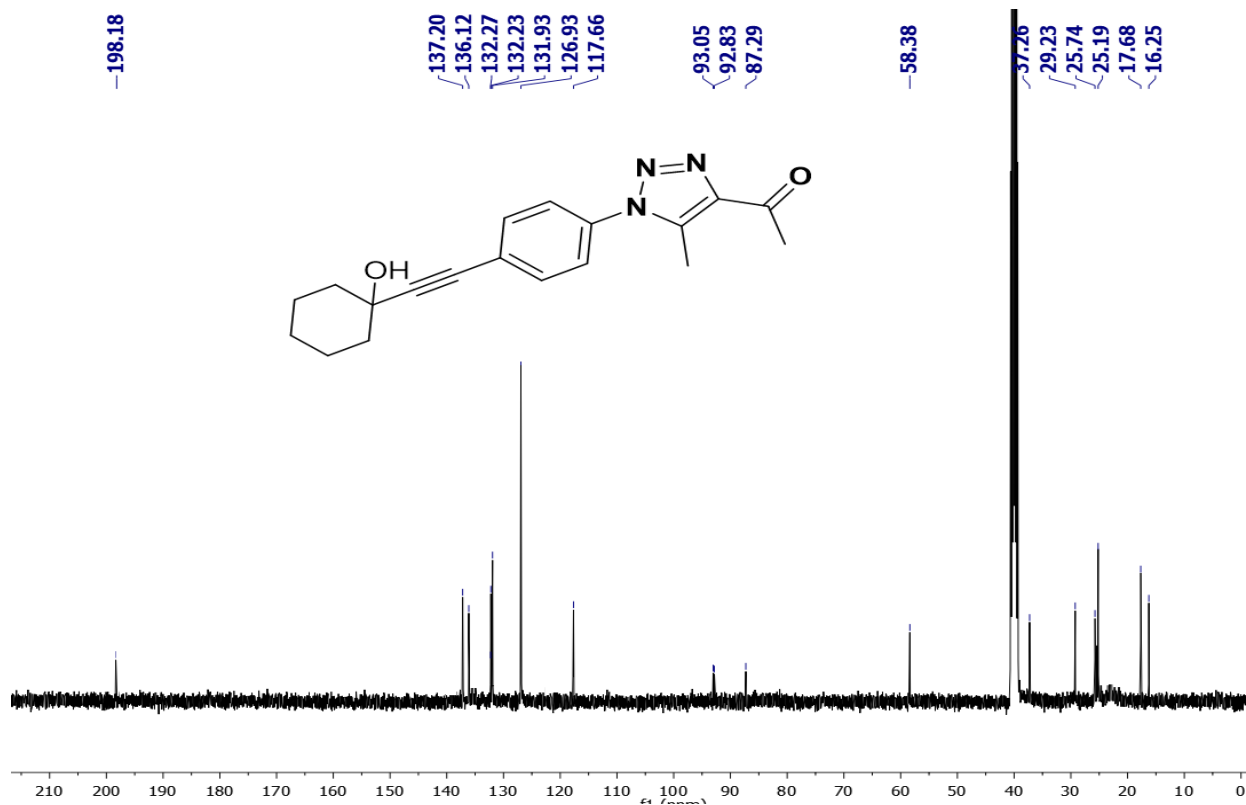

<sup>13</sup>C NMR of compound 15



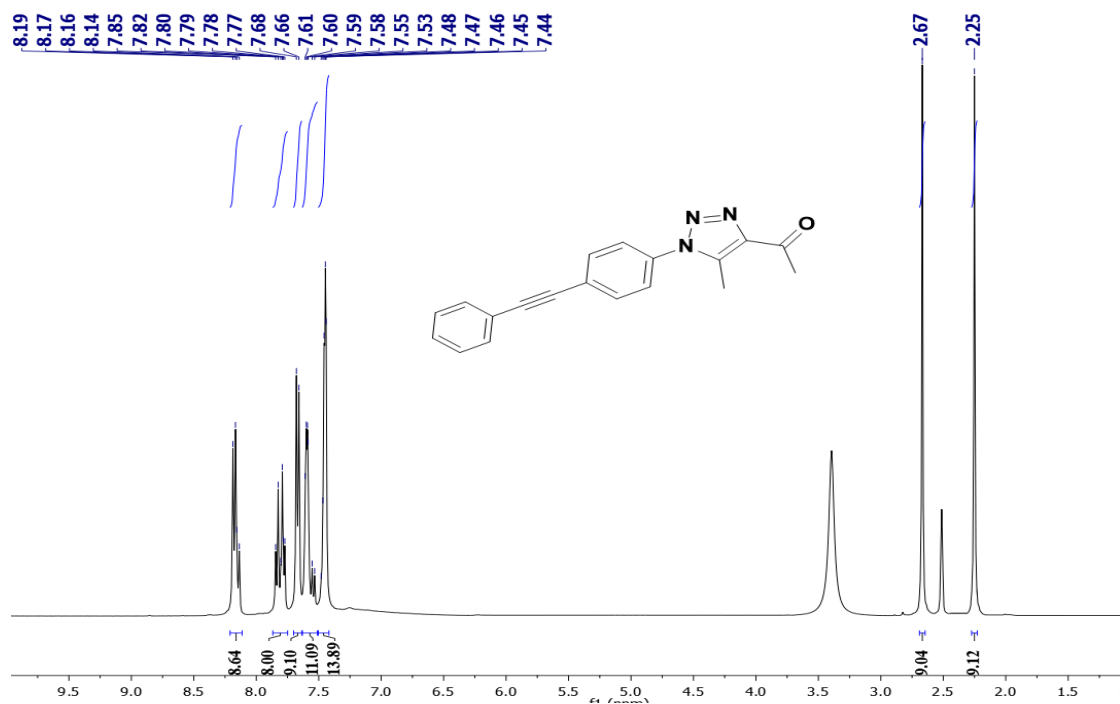

<sup>1</sup>H NMR of compound 16

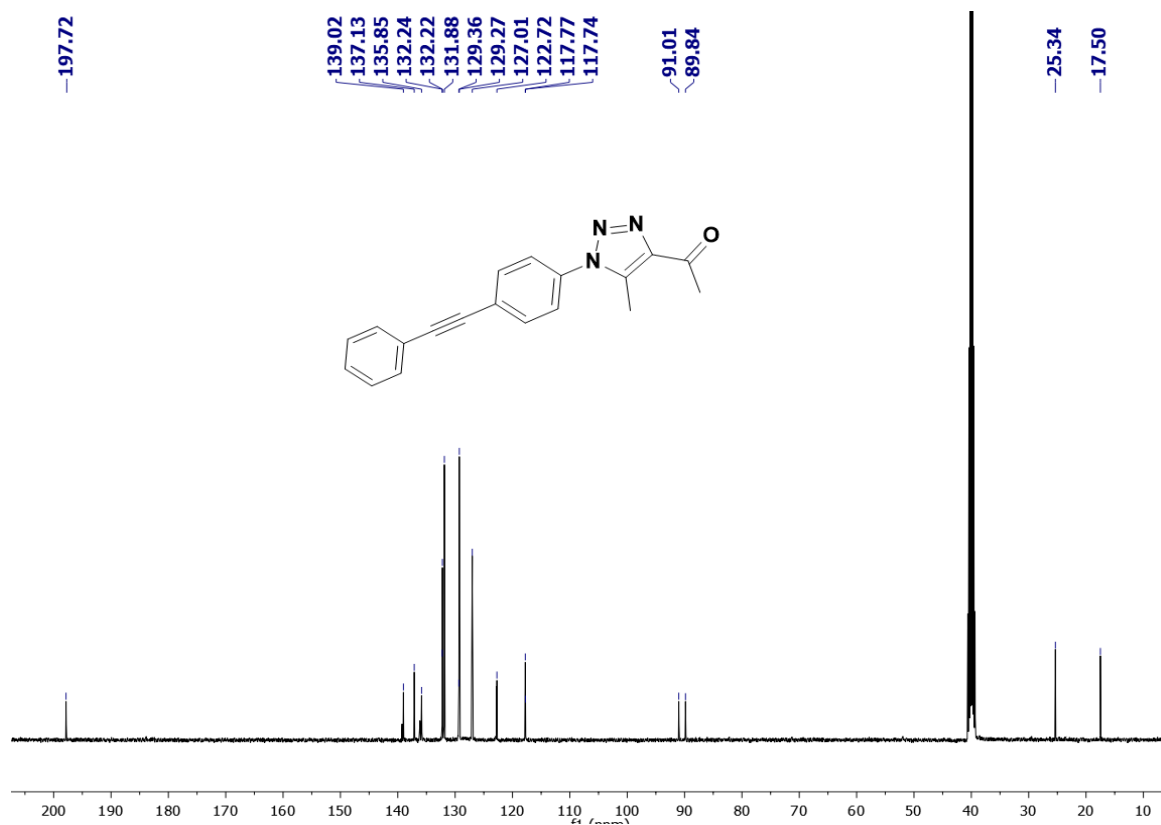

<sup>13</sup>C NMR of compound 16

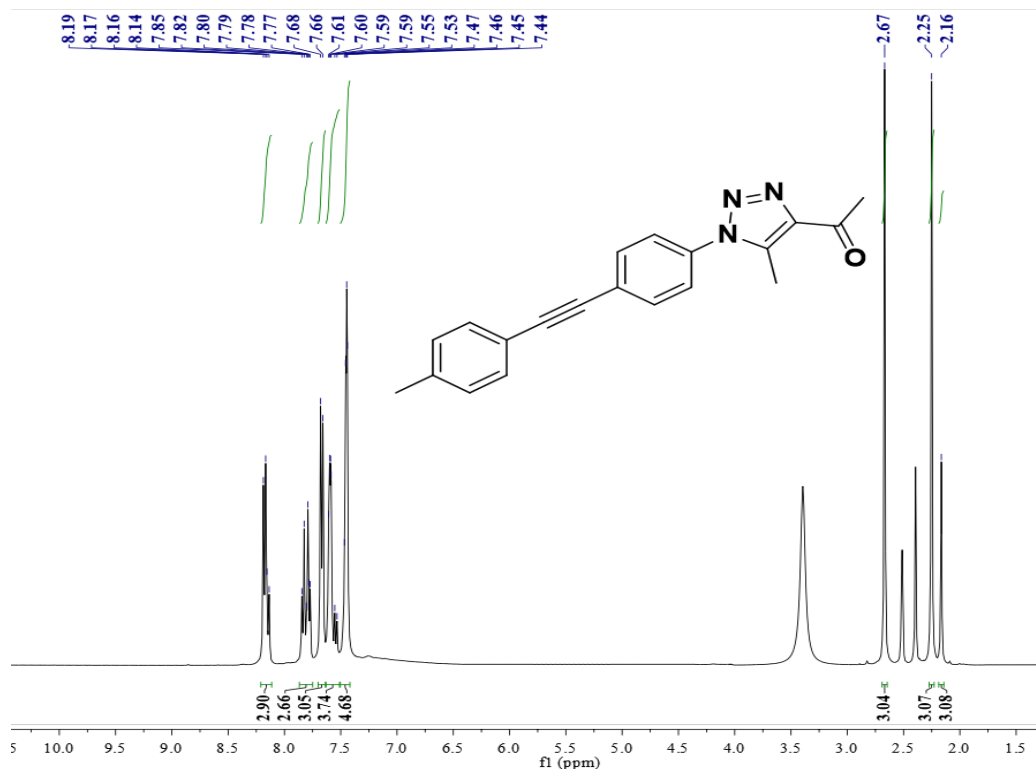

**<sup>1</sup>H NMR of compound 17**

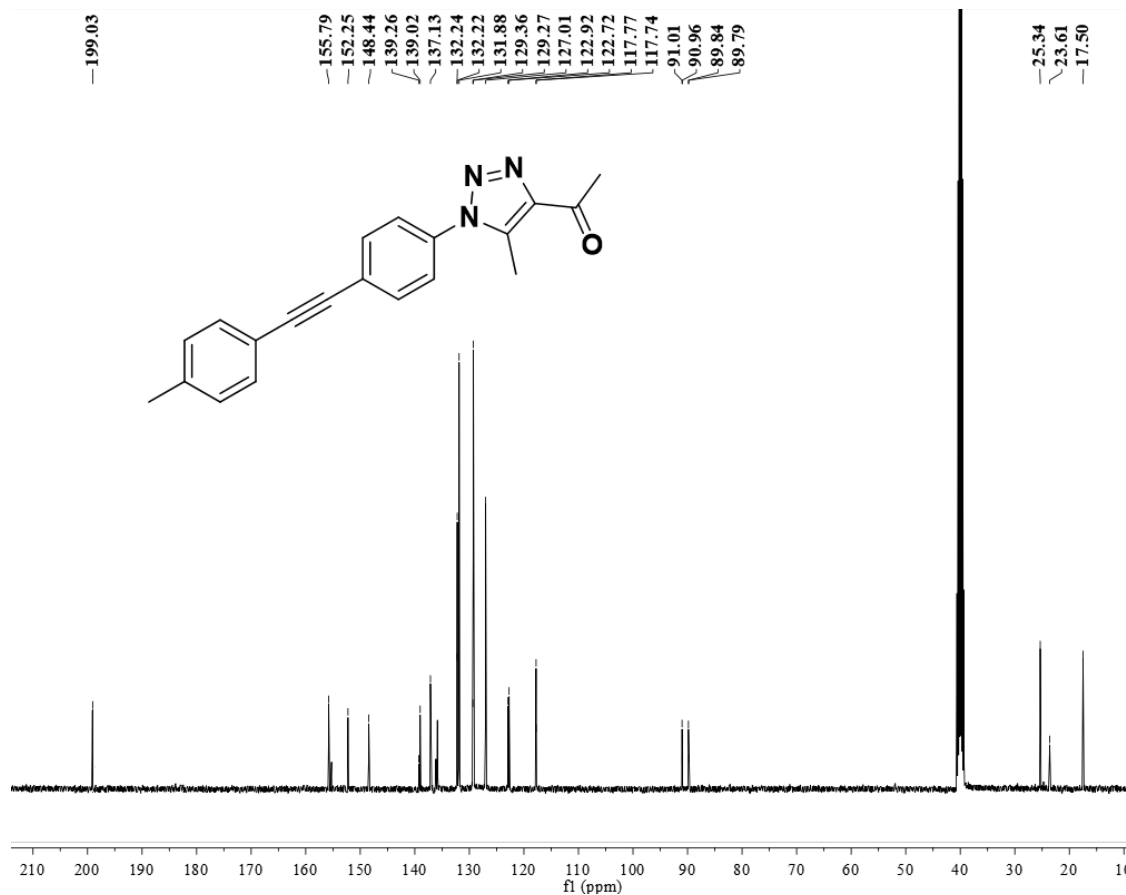

**<sup>13</sup>C NMR of compound 17**

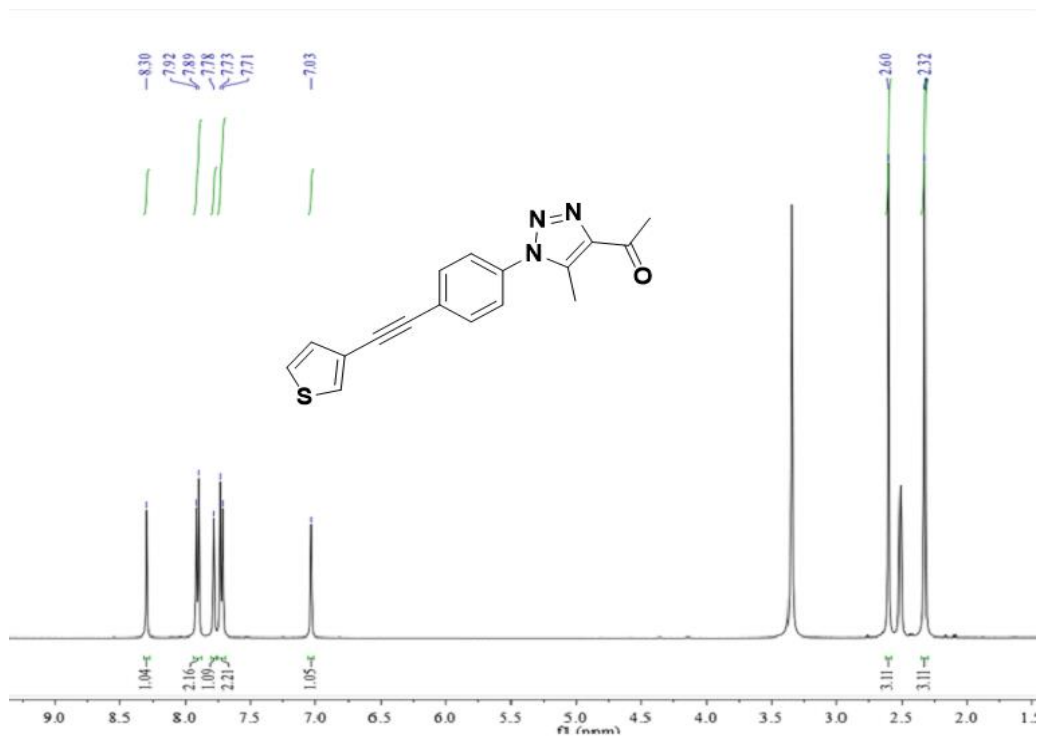

<sup>1</sup>H NMR of compound 18

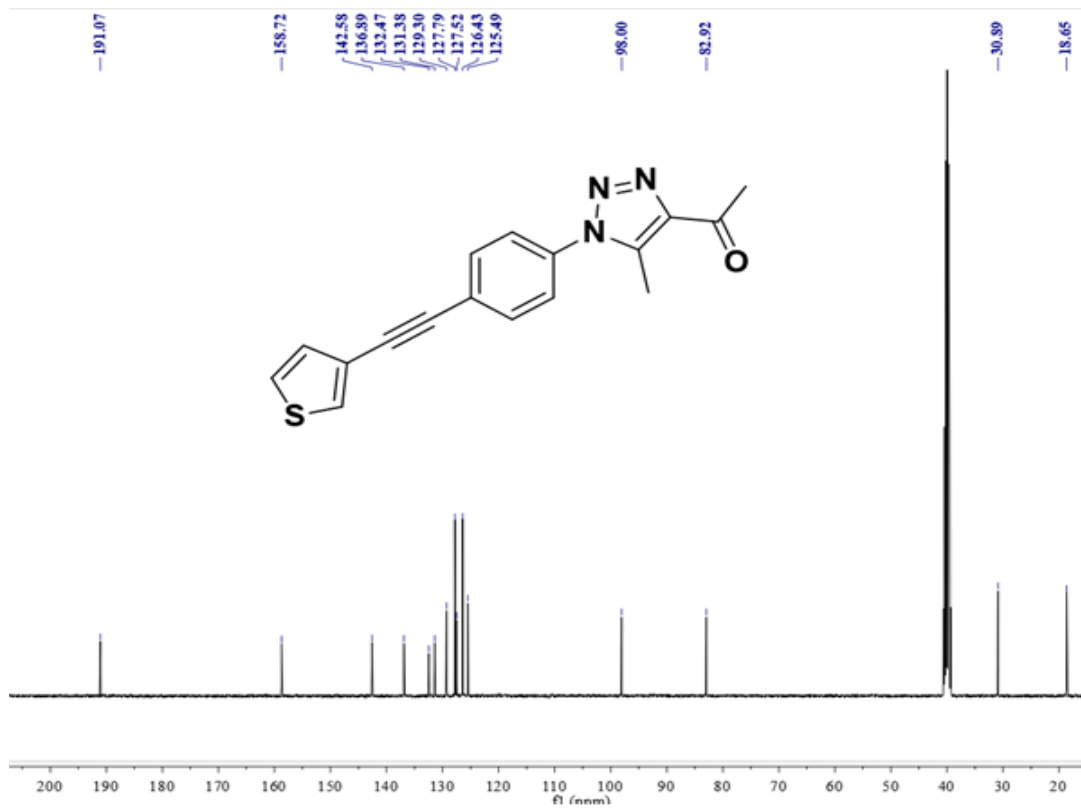

<sup>13</sup>C NMR of compound 18

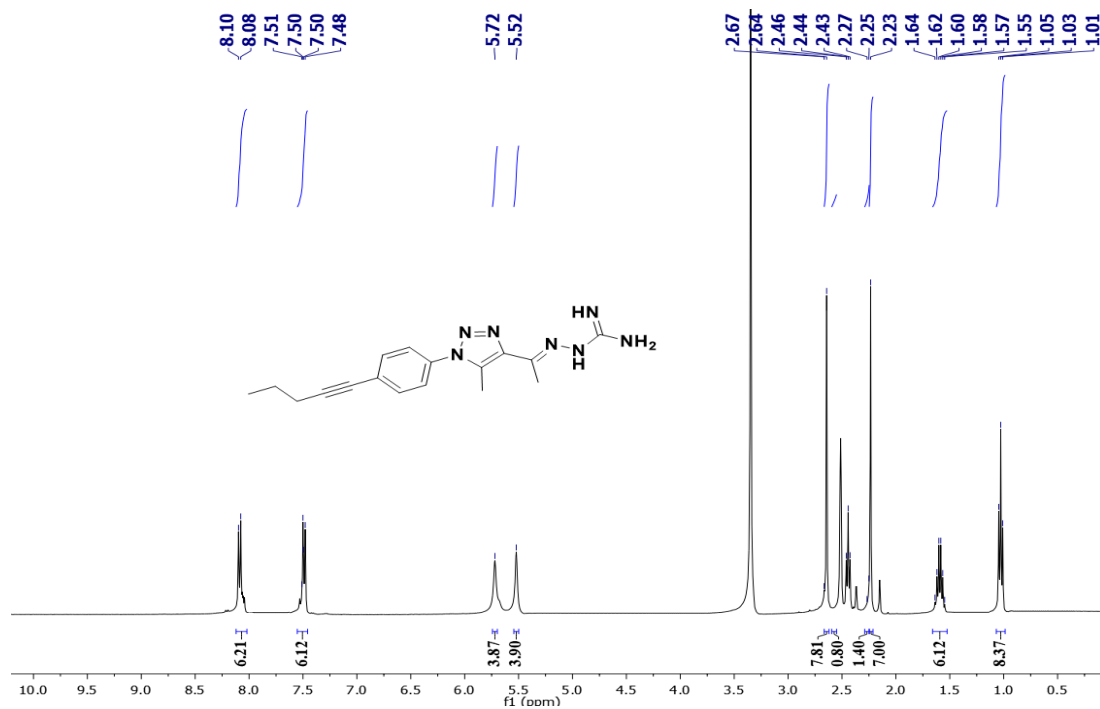

<sup>1</sup>H NMR of compound 19

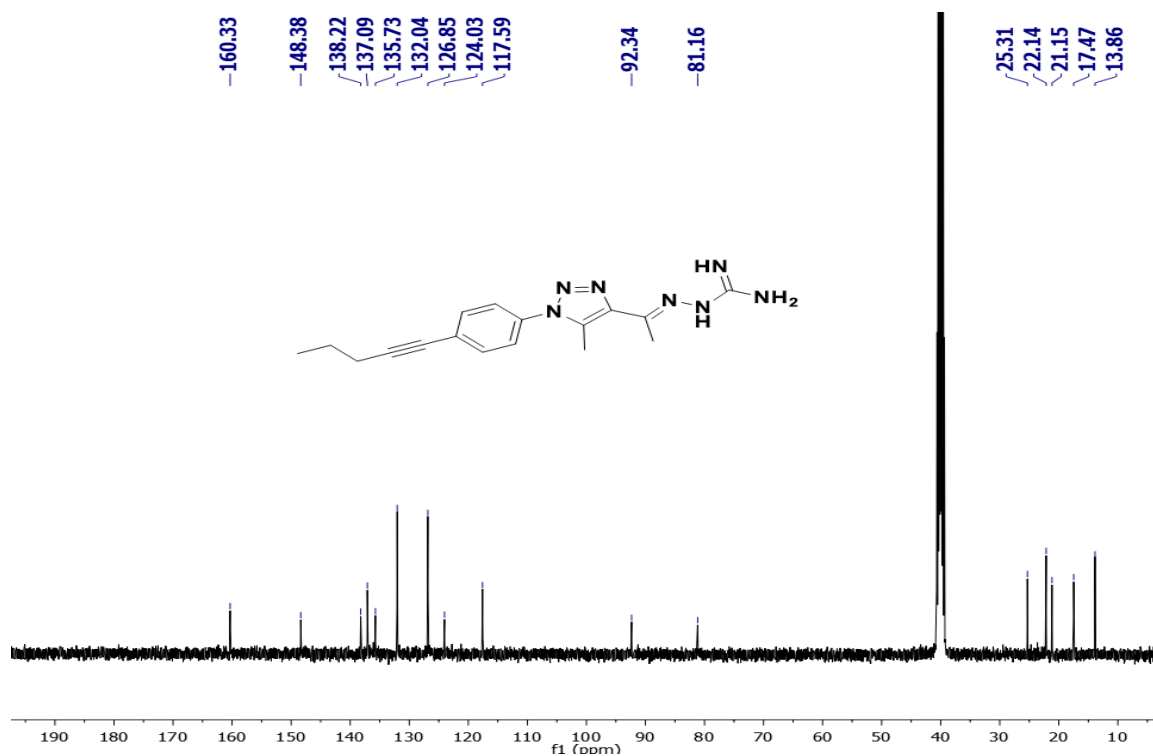

<sup>13</sup>C NMR of compound 19

## SAMPLE INFORMATION

|                   |                            |                     |                                            |
|-------------------|----------------------------|---------------------|--------------------------------------------|
| Sample Name:      | 3 SN 1                     | Acquired By:        | System                                     |
| Sample Type:      | Unknown                    | Sample Set Name:    | dsrtrr                                     |
| Vial:             | 25                         | Acq. Method Set:    | Trial 1 gradient                           |
| Injection #:      | 1                          | Processing Method:  | Default                                    |
| Injection Volume: | 10.00 ul                   | Channel Name:       | 380.0nm                                    |
| Run Time:         | 40.0 Minutes               | Proc. Chnl. Descr.: | W2996 PDA 380.0 nm (PDA 210.0 to 400.0 nm) |
| Date Acquired:    | 9/23/2021 10:14:12 AM EEST |                     |                                            |
| Date Processed:   | 9/25/2021 10:10:19 AM EEST |                     |                                            |

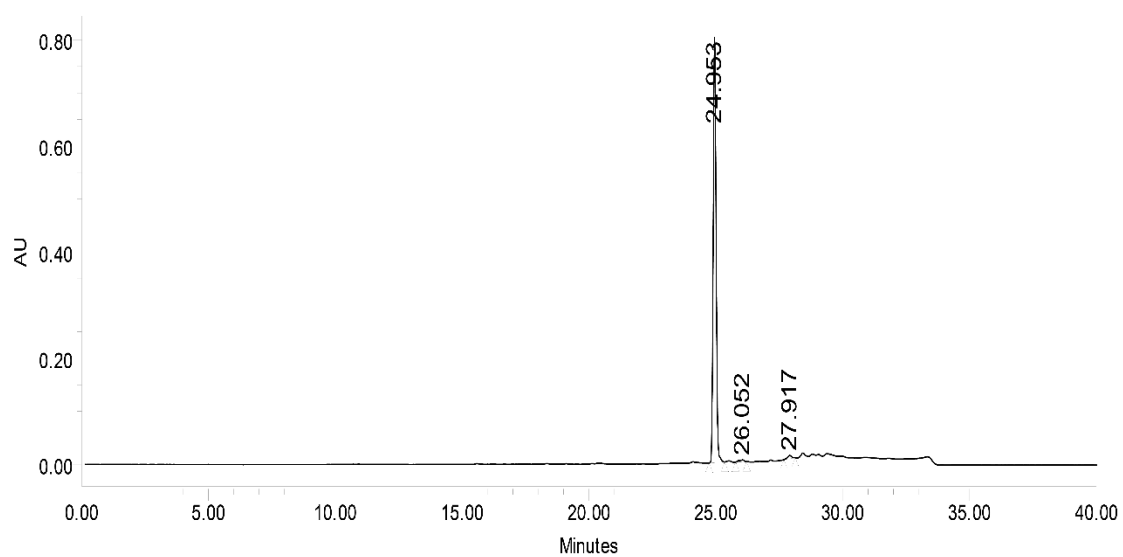

|   | RT     | Area    | % Area | Height |
|---|--------|---------|--------|--------|
| 1 | 24.953 | 6307513 | 98.07  | 801049 |
| 2 | 26.052 | 54696   | 0.85   | 3763   |
| 3 | 27.917 | 69272   | 1.08   | 5877   |

### HPLC of compound 19

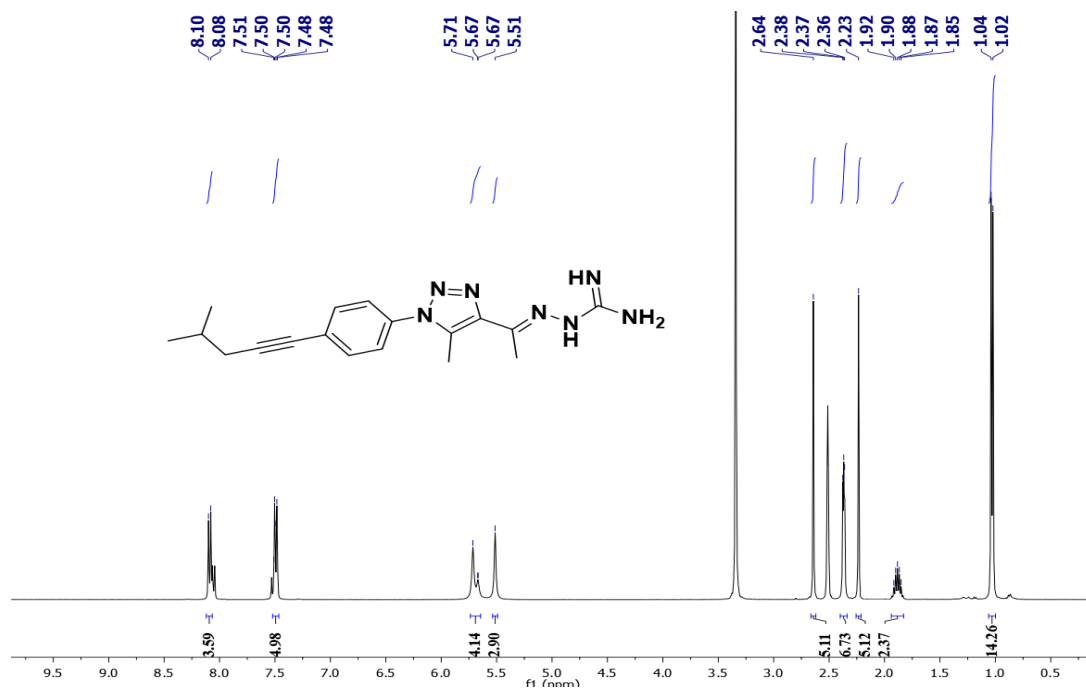

<sup>1</sup>H NMR of compound 20

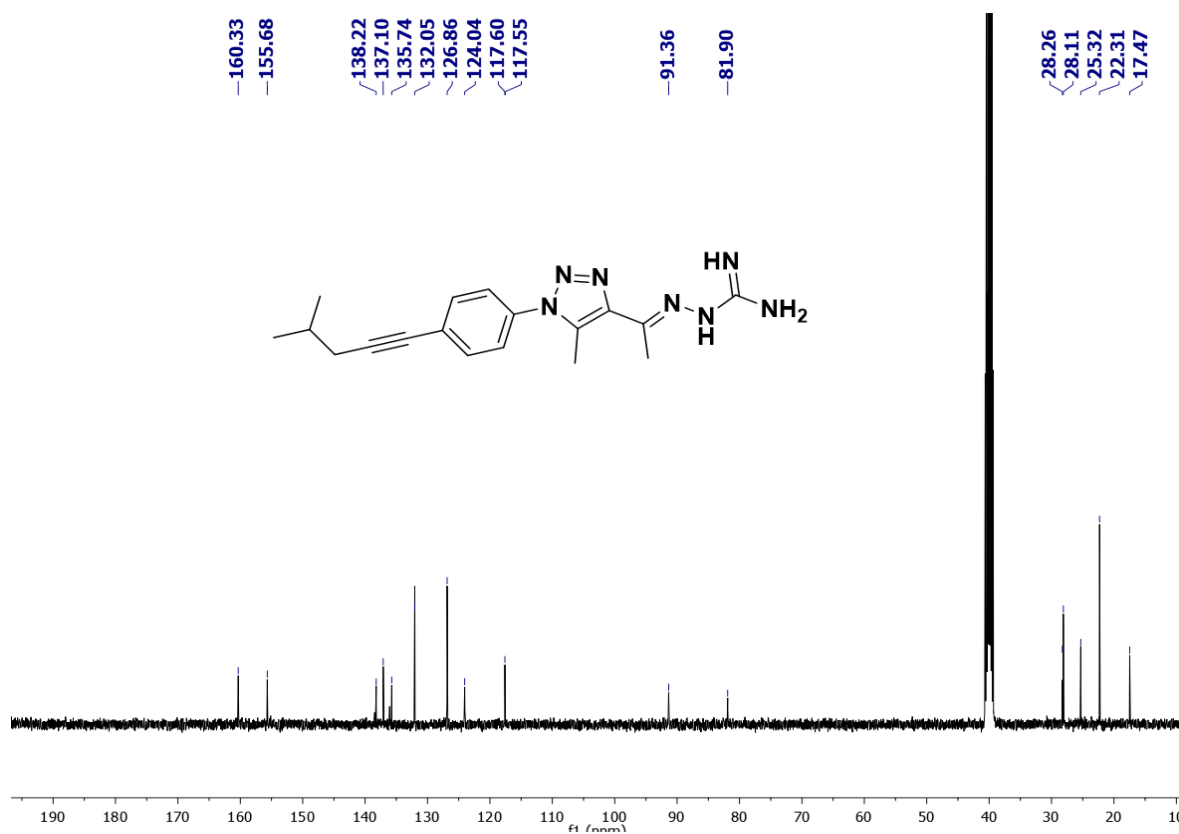

<sup>13</sup>C NMR of compound 20

## SAMPLE INFORMATION

|                   |                            |                     |                                  |
|-------------------|----------------------------|---------------------|----------------------------------|
| Sample Name:      | 3SN 6                      | Acquired By:        | System                           |
| Sample Type:      | Unknown                    | Sample Set Name:    | dsrtrr                           |
| Vial:             | 26                         | Acq. Method Set:    | Trial 1 gradient                 |
| Injection #:      | 1                          | Processing Method:  | Default                          |
| Injection Volume: | 10.00 ul                   | Channel Name:       | 380.0nm                          |
| Run Time:         | 40.0 Minutes               | Proc. Chnl. Descr.: | W2996 PDA 380.0 nm (PDA 210.0 tc |
| Date Acquired:    | 9/23/2021 10:55:12 AM EEST |                     |                                  |
| Date Processed:   | 9/25/2021 10:10:49 AM EEST |                     |                                  |

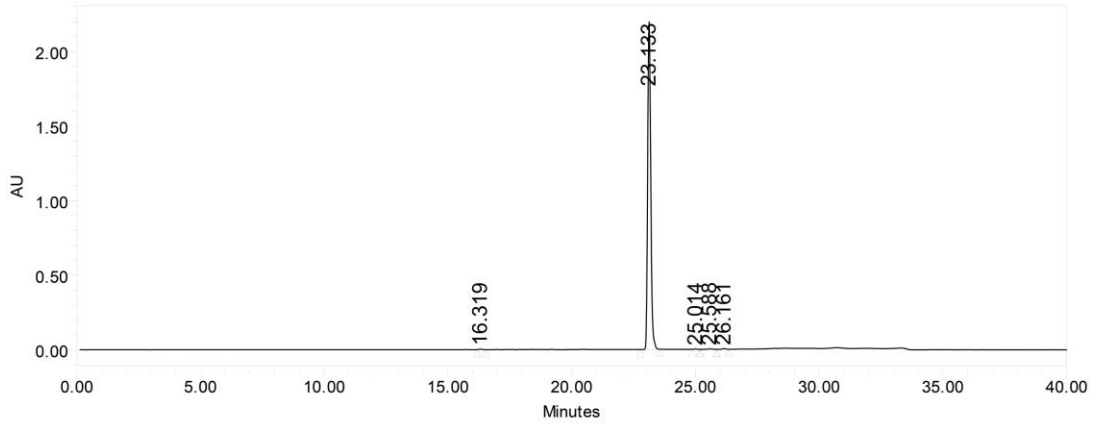

|   | RT     | Area     | % Area | Height  |
|---|--------|----------|--------|---------|
| 1 | 16.319 | 26071    | 0.14   | 3249    |
| 2 | 23.133 | 19029581 | 99.33  | 2195283 |
| 3 | 25.014 | 22557    | 0.12   | 2996    |
| 4 | 25.588 | 43357    | 0.23   | 3816    |
| 5 | 26.161 | 37042    | 0.19   | 3854    |

### HPLC of compound 20

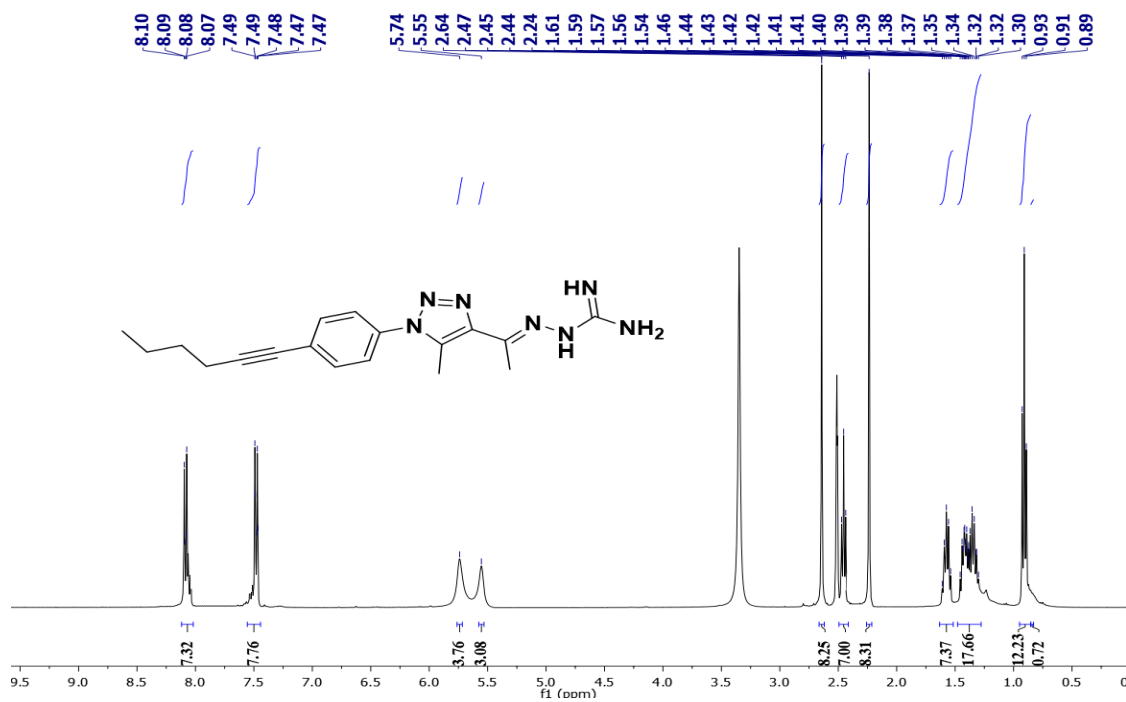

<sup>1</sup>H NMR of compound 21

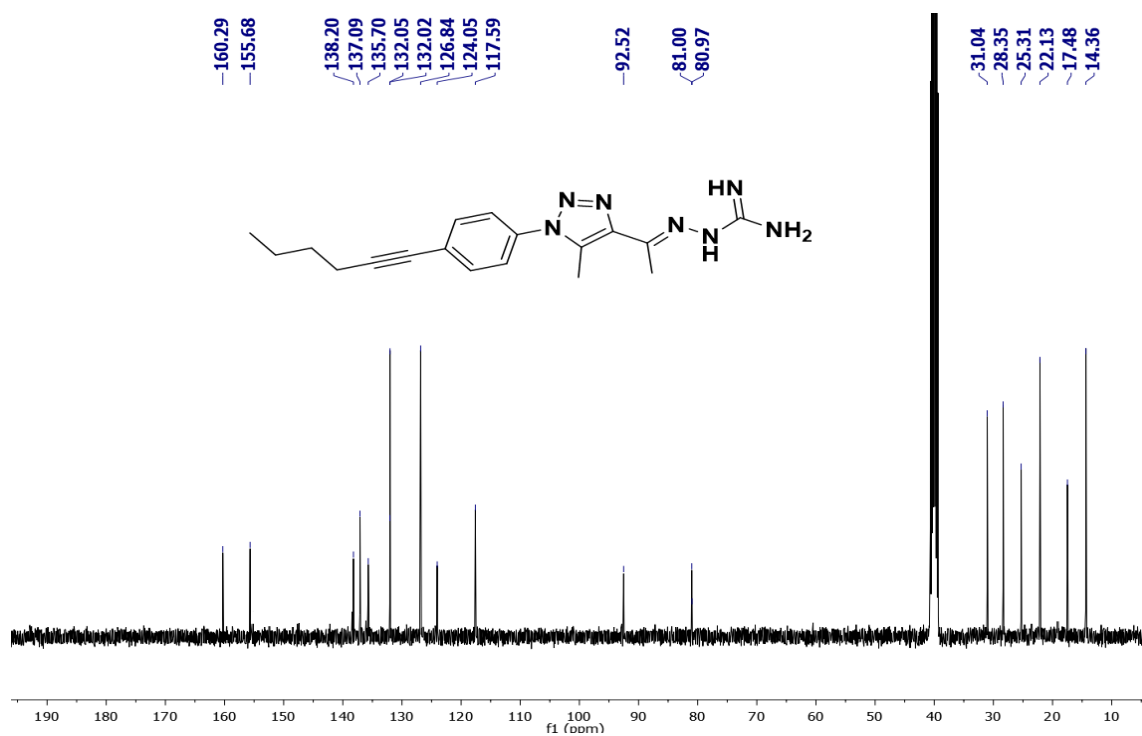

<sup>13</sup>C NMR of compound 21



## SAMPLE INFORMATION

|                                            |              |                     |                                  |
|--------------------------------------------|--------------|---------------------|----------------------------------|
| Sample Name:                               | 3SN 7        | Acquired By:        | System                           |
| Sample Type:                               | Unknown      | Sample Set Name:    | dsrtrr                           |
| Vial:                                      | 31           | Acq. Method Set:    | Trial 1 gradient                 |
| Injection #:                               | 1            | Processing Method:  | Default                          |
| Injection Volume:                          | 10.00 ul     | Channel Name:       | 380.0nm                          |
| Run Time:                                  | 40.0 Minutes | Proc. Chnl. Descr.: | W2996 PDA 380.0 nm (PDA 210.0 tc |
| Date Acquired: 9/23/2021 2:20:14 PM EEST   |              |                     |                                  |
| Date Processed: 9/25/2021 10:12:42 AM EEST |              |                     |                                  |

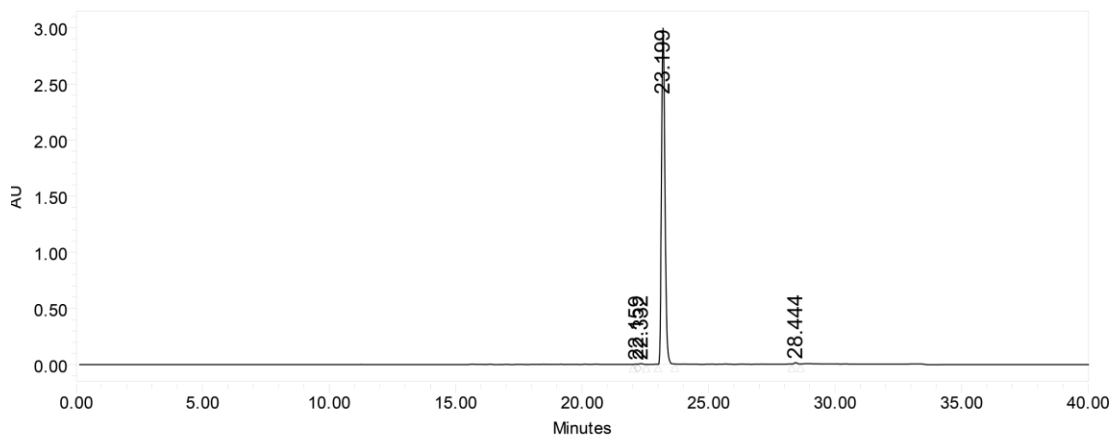

|   | RT     | Area     | % Area | Height  |
|---|--------|----------|--------|---------|
| 1 | 22.159 | 22642    | 0.08   | 3184    |
| 2 | 22.332 | 66747    | 0.23   | 6423    |
| 3 | 23.199 | 28255253 | 99.33  | 3003594 |
| 4 | 28.444 | 101149   | 0.36   | 12102   |

### HPLC of compound 21

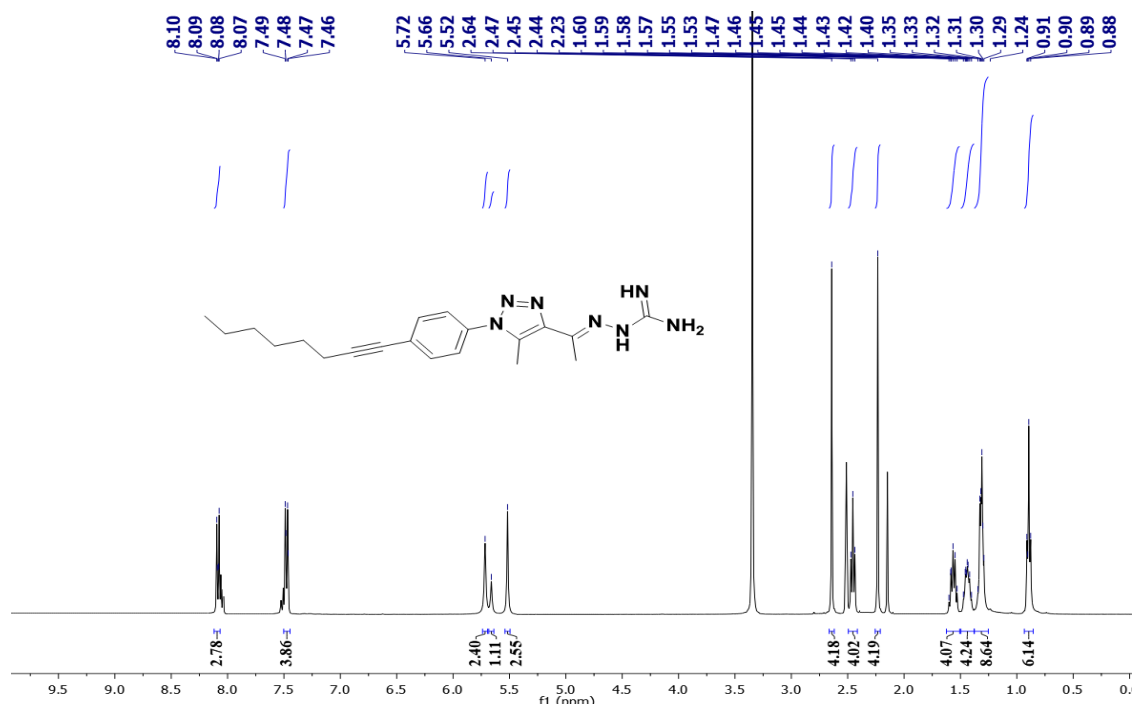

**<sup>1</sup>H NMR of compound 22**

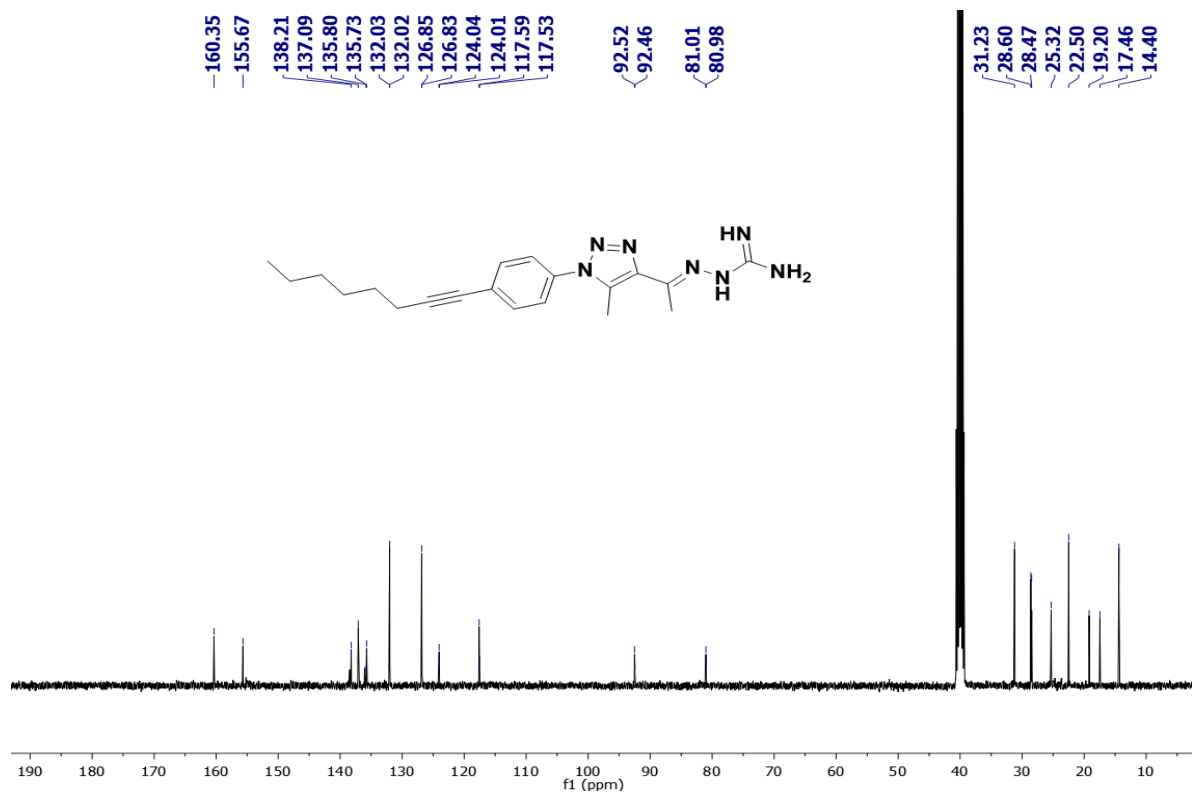

**<sup>13</sup>C NMR of compound 22**

## SAMPLE INFORMATION

|                   |                            |                     |                                  |
|-------------------|----------------------------|---------------------|----------------------------------|
| Sample Name:      | 3SN 10                     | Acquired By:        | System                           |
| Sample Type:      | Unknown                    | Sample Set Name:    | dsrtrr                           |
| Vial:             | 27                         | Acq. Method Set:    | Trial 1 gradient                 |
| Injection #:      | 1                          | Processing Method:  | Default                          |
| Injection Volume: | 10.00 ul                   | Channel Name:       | 380.0nm                          |
| Run Time:         | 40.0 Minutes               | Proc. Chnl. Descr.: | W2996 FDA 380.0 nm (FDA 210.0 to |
| Date Acquired:    | 9/23/2021 11:36:12 AM EEST |                     |                                  |
| Date Processed:   | 9/25/2021 10:11:19 AM EEST |                     |                                  |

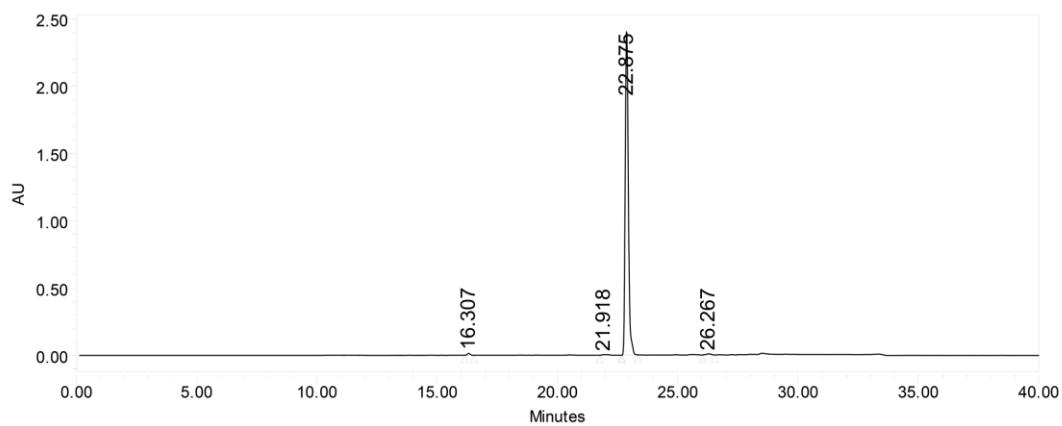

|   | RT     | Area     | % Area | Height  |
|---|--------|----------|--------|---------|
| 1 | 16.307 | 116481   | 0.53   | 14105   |
| 2 | 21.918 | 86390    | 0.39   | 4221    |
| 3 | 22.875 | 21816484 | 98.61  | 2419517 |
| 4 | 26.267 | 104513   | 0.47   | 7530    |

### HPLC of compound 22

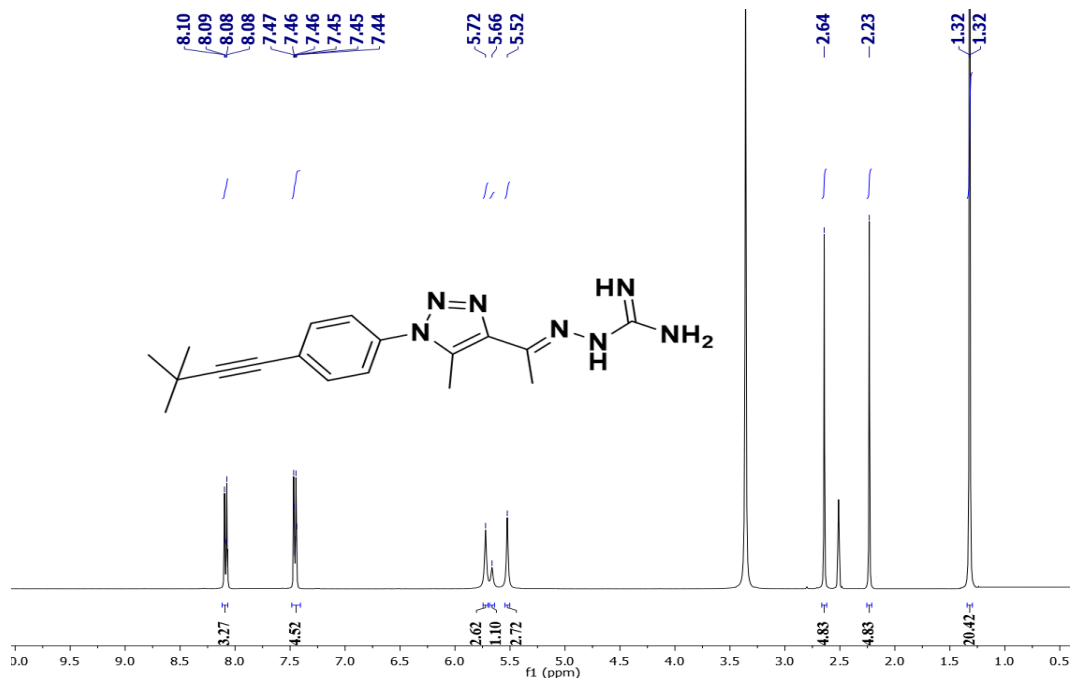

<sup>1</sup>H NMR of compound 23

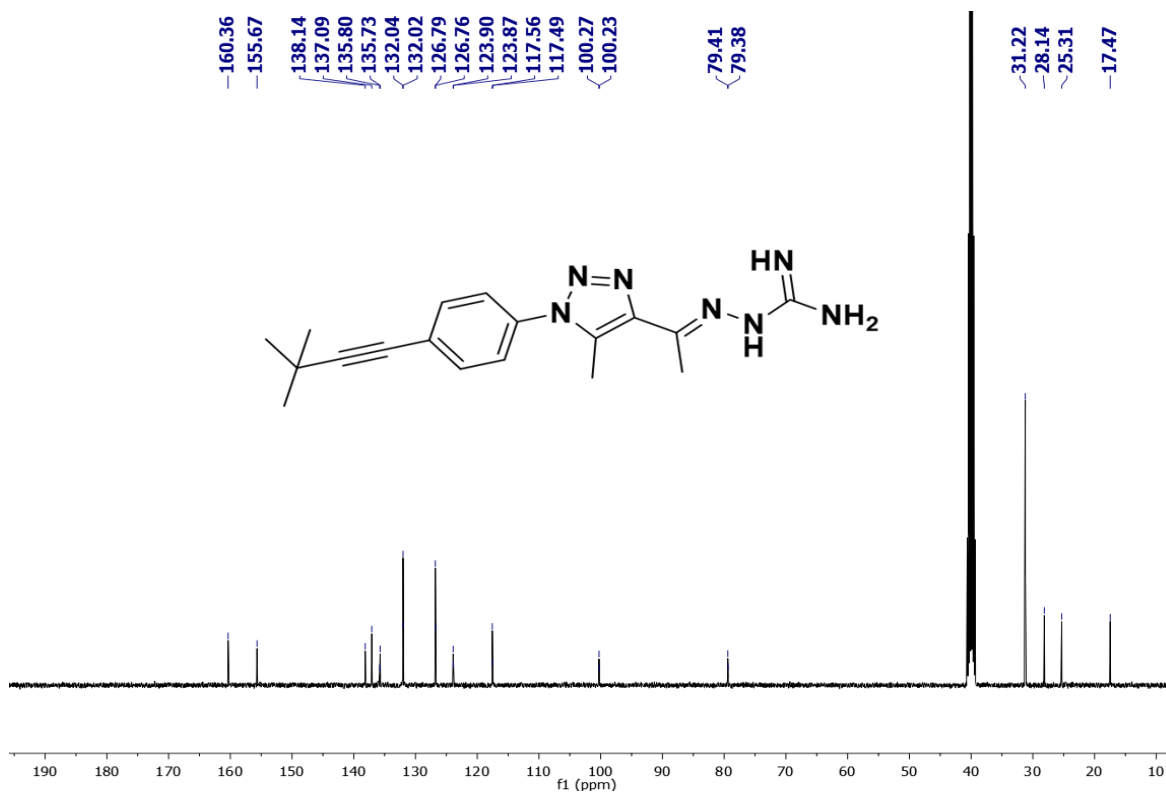

<sup>13</sup>C NMR of compound 23

### SAMPLE INFORMATION

|                   |                            |                     |                                  |
|-------------------|----------------------------|---------------------|----------------------------------|
| Sample Name:      | 3SN 13                     | Acquired By:        | System                           |
| Sample Type:      | Unknown                    | Sample Set Name:    | dsrtrr                           |
| Vial:             | 28                         | Acq. Method Set:    | Trial 1 gradient                 |
| Injection #:      | 1                          | Processing Method:  | Default                          |
| Injection Volume: | 10.00 ul                   | Channel Name:       | 380.0nm                          |
| Run Time:         | 40.0 Minutes               | Proc. Chnl. Descr.: | W2996 PDA 380.0 nm (PDA 210.0 to |
| Date Acquired:    | 9/23/2021 12:17:13 PM EEST |                     |                                  |
| Date Processed:   | 9/25/2021 10:11:39 AM EEST |                     |                                  |

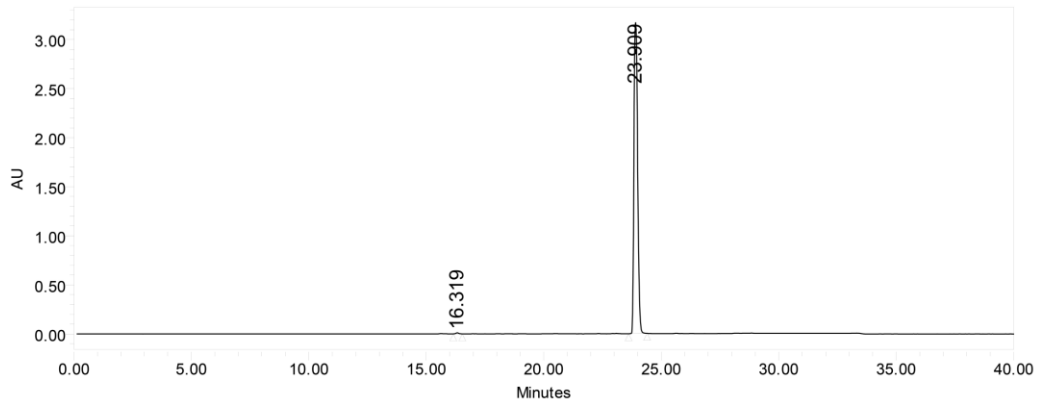

|   | RT     | Area     | % Area | Height  |
|---|--------|----------|--------|---------|
| 1 | 16.319 | 87894    | 0.26   | 10420   |
| 2 | 23.909 | 34345973 | 99.74  | 3180506 |

### HPLC of compound 23

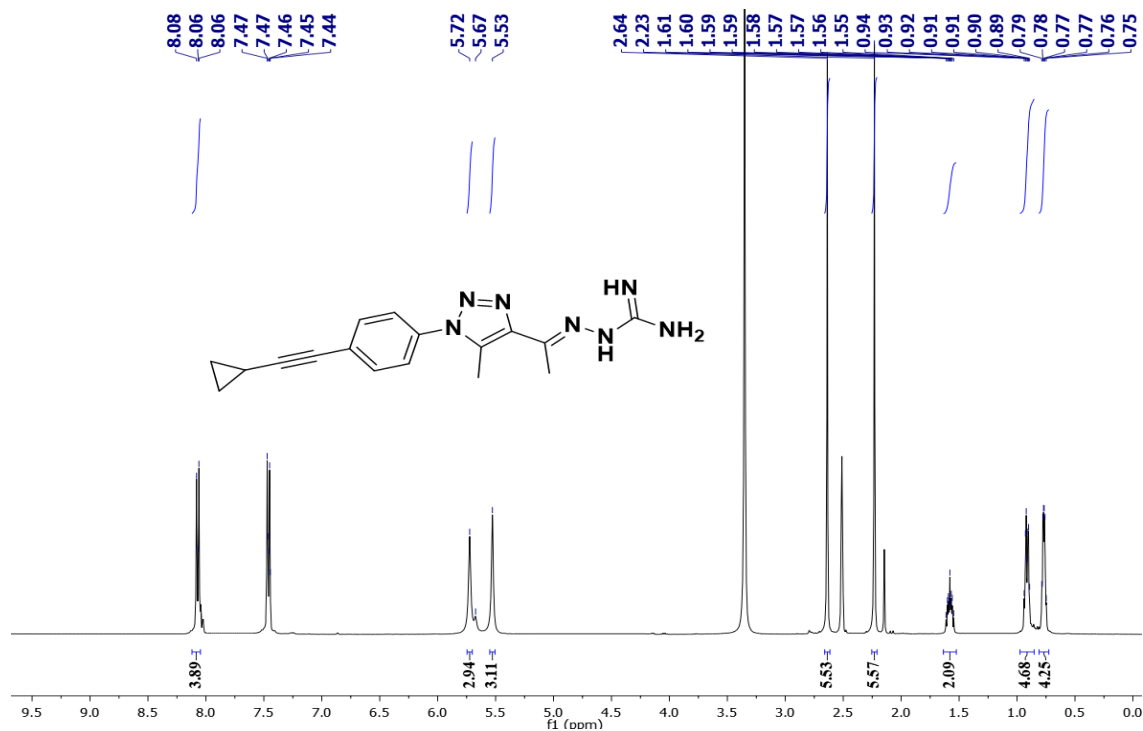

**<sup>1</sup>H NMR of compound 24**

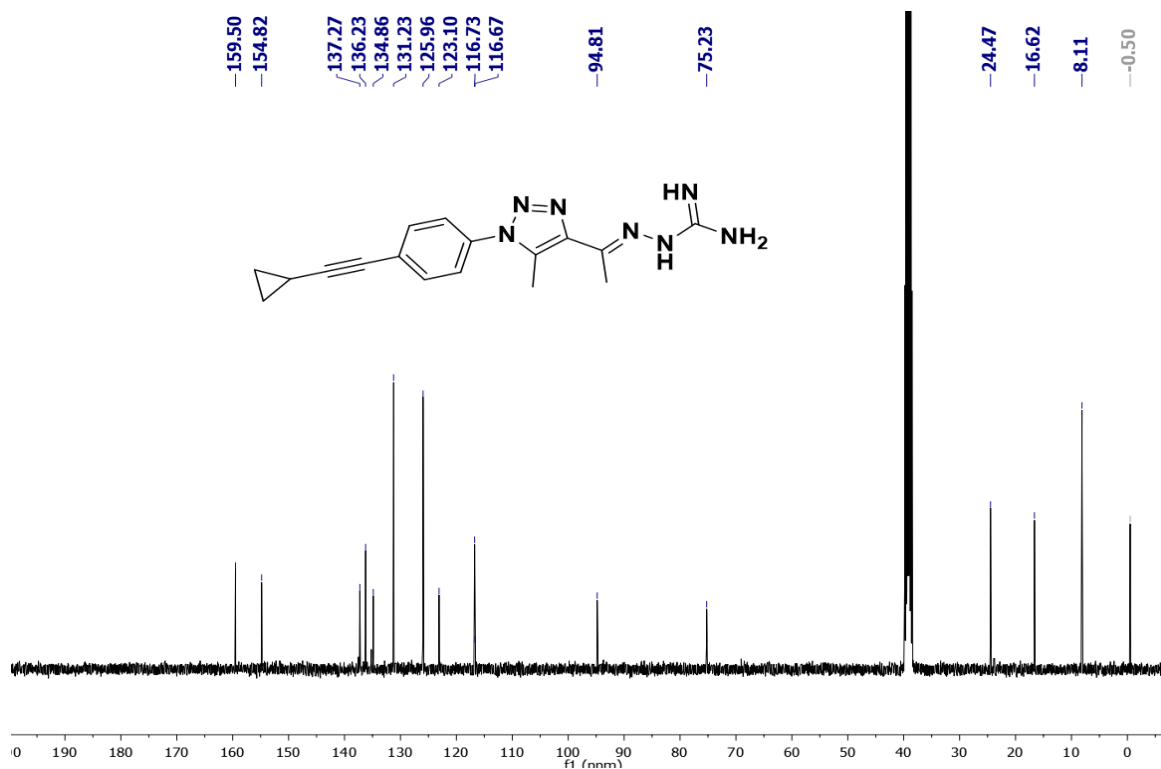

**<sup>13</sup>C NMR of compound 24**

## SAMPLE INFORMATION

|                   |                            |                     |                                  |
|-------------------|----------------------------|---------------------|----------------------------------|
| Sample Name:      | 3SN 4                      | Acquired By:        | System                           |
| Sample Type:      | Unknown                    | Sample Set Name:    | dsrtrr                           |
| Vial:             | 33                         | Acq. Method Set:    | Trial 1 gradient                 |
| Injection #:      | 1                          | Processing Method:  | Default                          |
| Injection Volume: | 10.00 ul                   | Channel Name:       | 380.0nm                          |
| Run Time:         | 40.0 Minutes               | Proc. Chnl. Descr.: | W2996 FDA 380.0 nm (FDA 210.0 to |
| Date Acquired:    | 9/23/2021 3:42:14 PM EEST  |                     |                                  |
| Date Processed:   | 9/25/2021 10:13:22 AM EEST |                     |                                  |

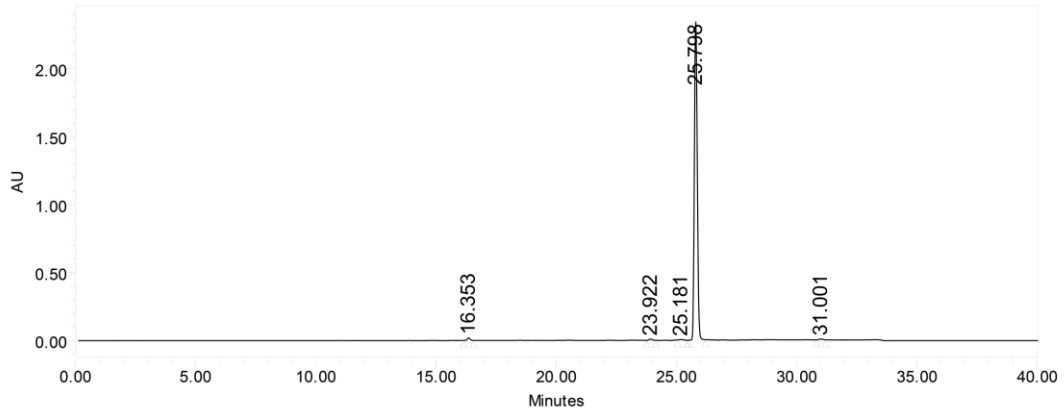

|   | RT     | Area     | % Area | Height  |
|---|--------|----------|--------|---------|
| 1 | 16.353 | 153971   | 0.76   | 18345   |
| 2 | 23.922 | 83008    | 0.41   | 9528    |
| 3 | 25.181 | 52962    | 0.26   | 4640    |
| 4 | 25.798 | 19911687 | 98.23  | 2336748 |
| 5 | 31.001 | 68107    | 0.34   | 6330    |

### HPLC of compound 24

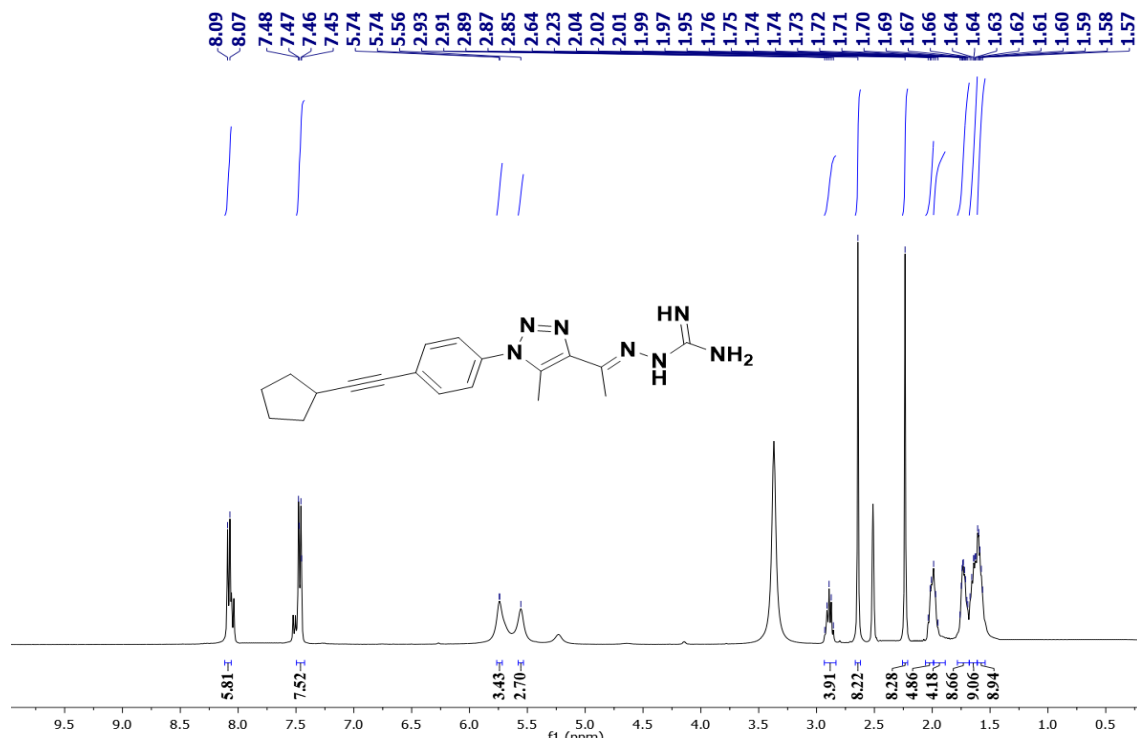

<sup>1</sup>H NMR of compound 25

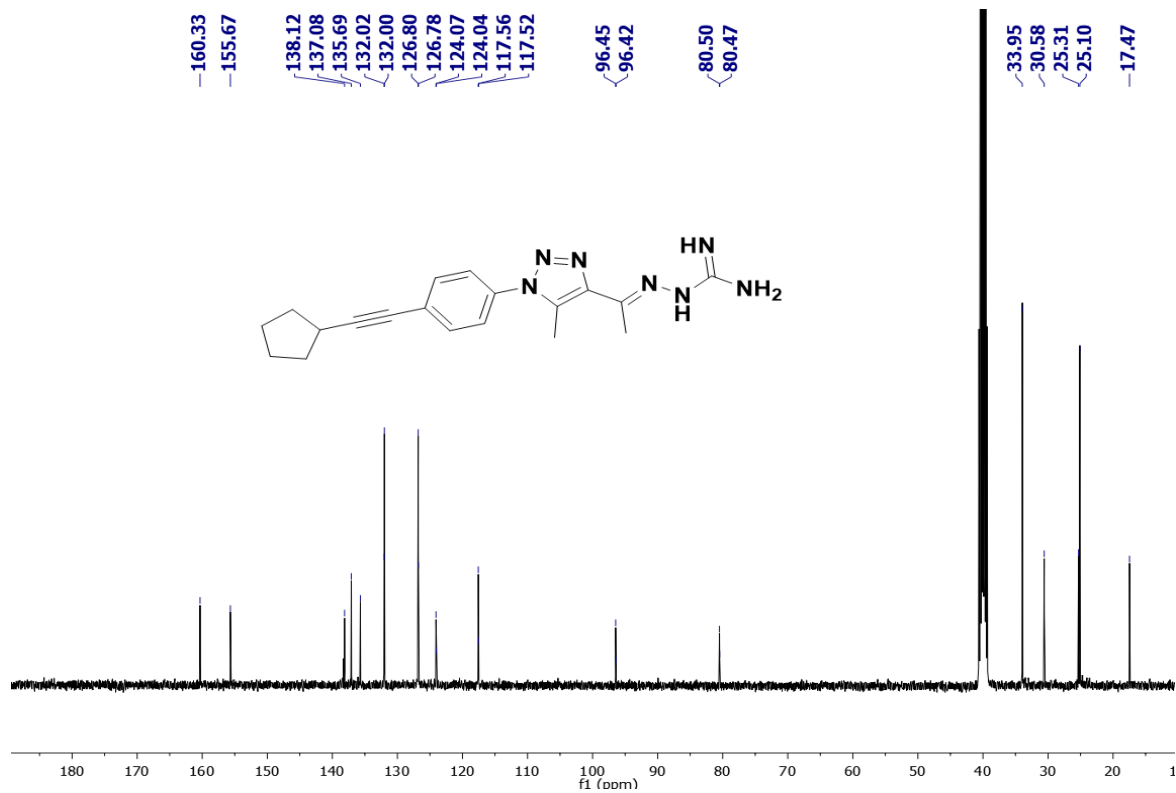

<sup>13</sup>C NMR of compound 25



## SAMPLE INFORMATION

|                                            |                                                      |
|--------------------------------------------|------------------------------------------------------|
| Sample Name: 3SN-2                         | Acquired By: System                                  |
| Sample Type: Unknown                       | Sample Set Name: dsrtrr                              |
| Vial: 34                                   | Acq. Method Set: Trial 1 gradient                    |
| Injection #: 1                             | Processing Method: Default                           |
| Injection Volume: 10.00 ul                 | Channel Name: 300.0nm                                |
| Run Time: 40.0 Minutes                     | Proc. Chnl. Descr.: W2996 PDA 300.0 nm (PDA 210.0 to |
| Date Acquired: 9/23/2021 4:23:14 PM EEST   |                                                      |
| Date Processed: 9/25/2021 10:14:21 AM EEST |                                                      |

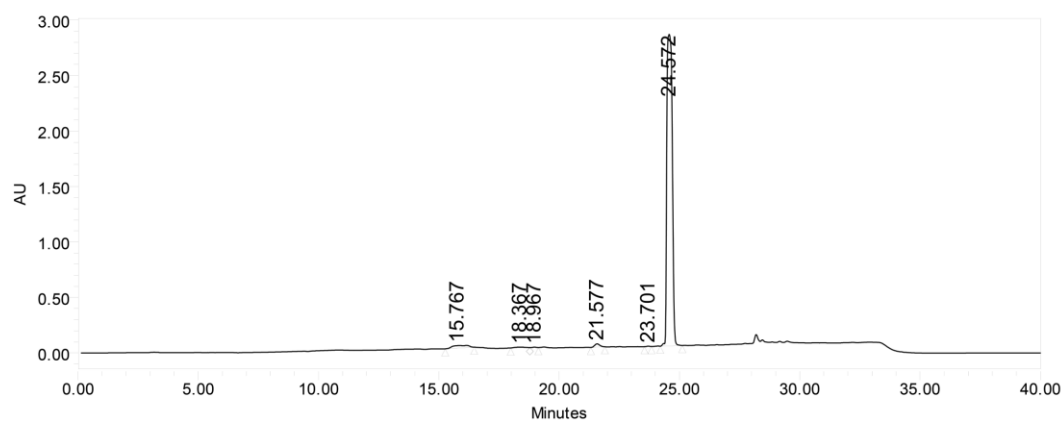

|   | RT     | Area     | % Area | Height  |
|---|--------|----------|--------|---------|
| 1 | 15.767 | 1017649  | 2.23   | 22382   |
| 2 | 18.367 | 189445   | 0.42   | 6558    |
| 3 | 18.967 | 44091    | 0.10   | 4311    |
| 4 | 21.577 | 434099   | 0.95   | 29567   |
| 5 | 23.701 | 28443    | 0.06   | 3885    |
| 6 | 24.572 | 43850569 | 96.24  | 2806716 |

### HPLC of compound 25

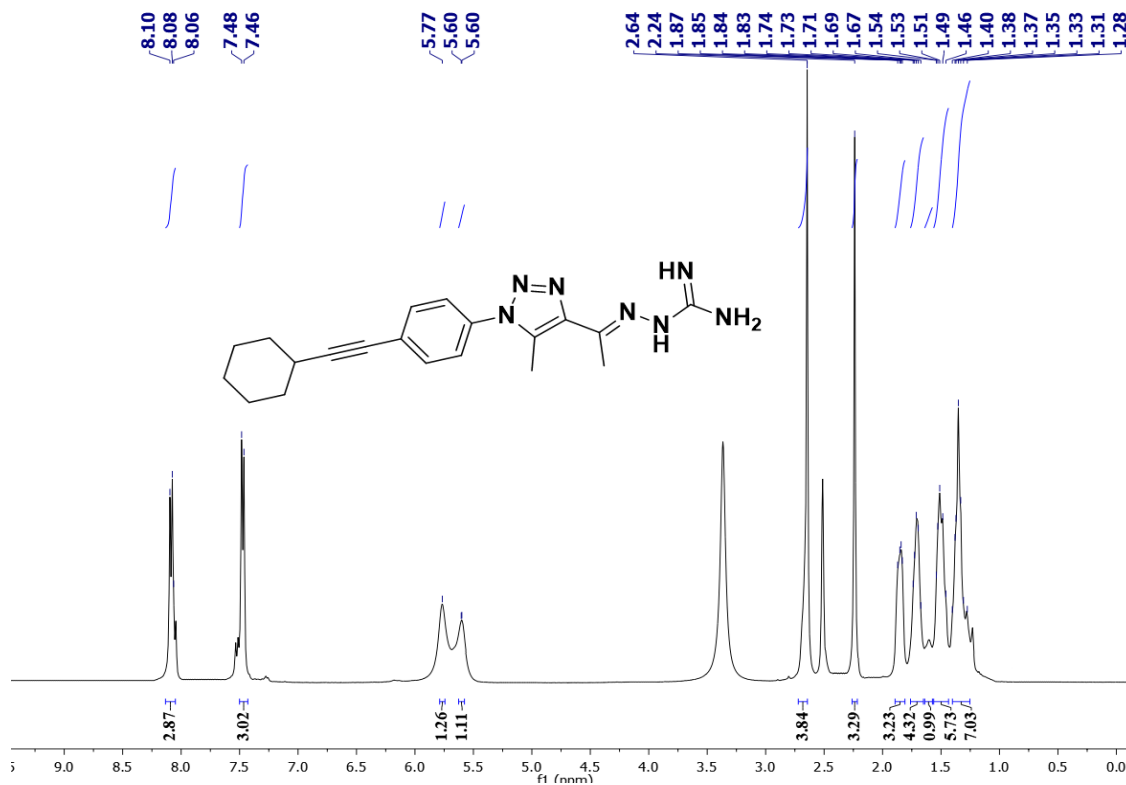

<sup>1</sup>H NMR of compound 26

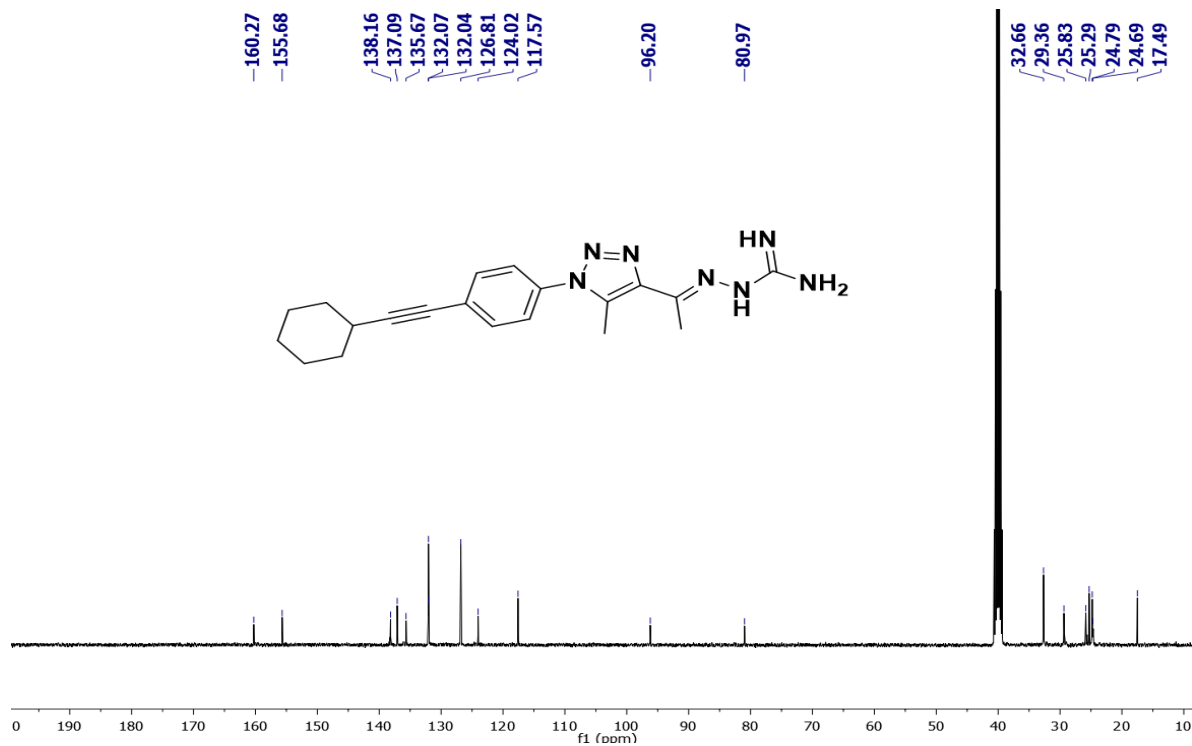

<sup>13</sup>C NMR of compound 26

## SAMPLE INFORMATION

|                   |                            |                     |                                            |
|-------------------|----------------------------|---------------------|--------------------------------------------|
| Sample Name:      | 3SN-15                     | Acquired By:        | System                                     |
| Sample Type:      | Unknown                    | Sample Set Name:    | dsrtrr                                     |
| Vial:             | 35                         | Acq. Method Set:    | Trial 1 gradient                           |
| Injection #:      | 1                          | Processing Method:  | Default                                    |
| Injection Volume: | 10.00 ul                   | Channel Name:       | 375.0nm                                    |
| Run Time:         | 40.0 Minutes               | Proc. Chnl. Descr.: | W2996 PDA 375.0 nm (PDA 210.0 to 400.0 nm) |
| Date Acquired:    | 9/23/2021 5:04:13 PM EEST  |                     |                                            |
| Date Processed:   | 9/25/2021 10:15:04 AM EEST |                     |                                            |

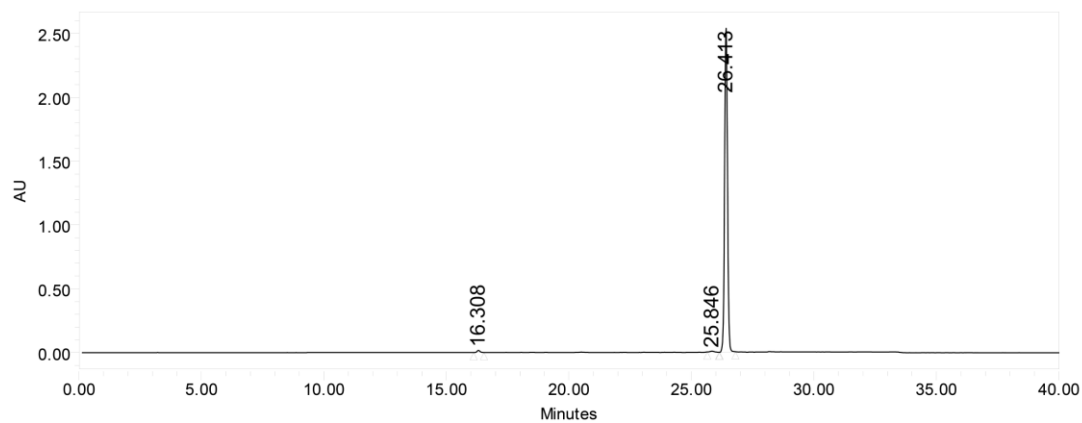

|   | RT     | Area     | % Area | Height  |
|---|--------|----------|--------|---------|
| 1 | 16.308 | 136166   | 0.64   | 16002   |
| 2 | 25.846 | 81675    | 0.39   | 7243    |
| 3 | 26.413 | 20966280 | 98.97  | 2545583 |

### HPLC of compound 26

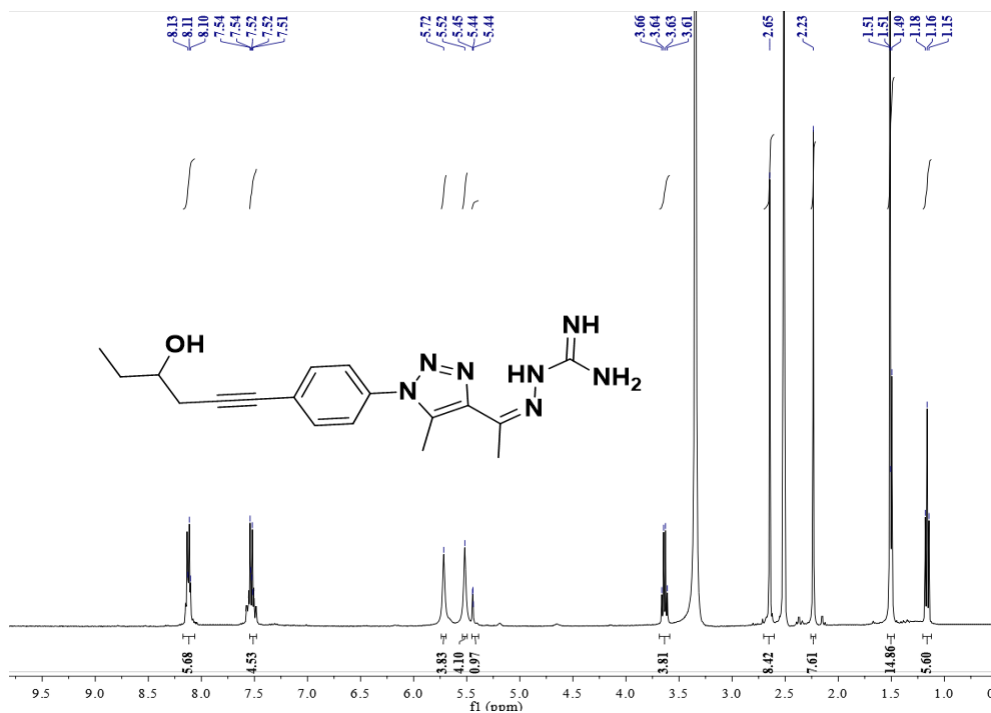

<sup>1</sup>H NMR of compound 27

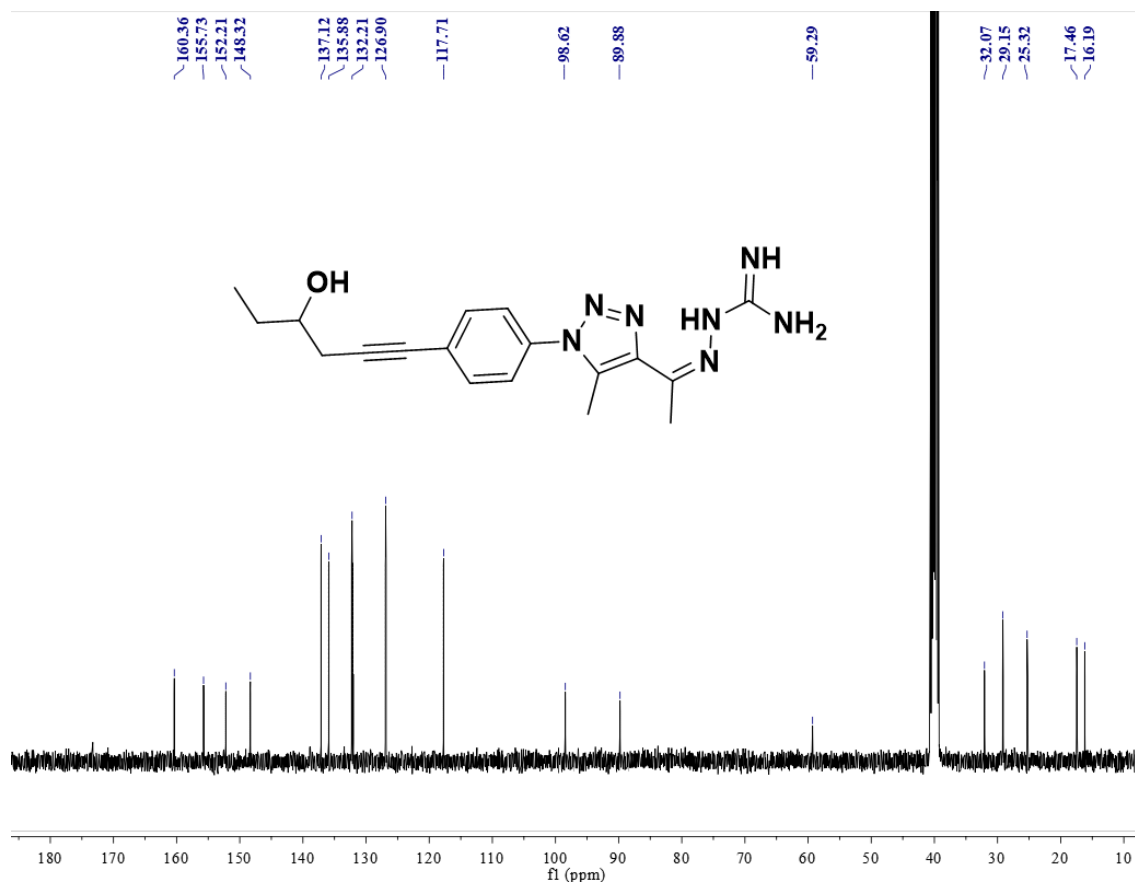

<sup>13</sup>C NMR of compound 27

## SAMPLE INFORMATION

|                                            |                                                                |
|--------------------------------------------|----------------------------------------------------------------|
| Sample Name: 3SN-9                         | Acquired By: System                                            |
| Sample Type: Unknown                       | Sample Set Name: dsrtr                                         |
| Vial: 38                                   | Acq. Method Set: Trial 1 gradient                              |
| Injection #: 1                             | Processing Method: Default                                     |
| Injection Volume: 10.00 ul                 | Channel Name: 380.0nm                                          |
| Run Time: 40.0 Minutes                     | Proc. Chnl. Descr.: W2996 PDA 380.0 nm (PDA 210.0 to 400.0 nm) |
| Date Acquired: 9/23/2021 7:07:13 PM EEST   |                                                                |
| Date Processed: 9/25/2021 10:19:57 AM EEST |                                                                |

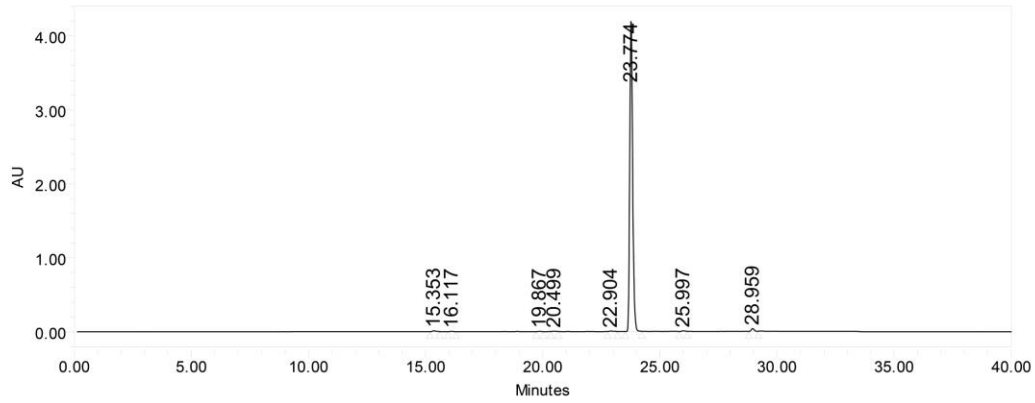

|   | RT     | Area     | % Area | Height  |
|---|--------|----------|--------|---------|
| 1 | 15.353 | 117024   | 0.32   | 11146   |
| 2 | 16.117 | 36635    | 0.10   | 4562    |
| 3 | 19.867 | 31563    | 0.08   | 3911    |
| 4 | 20.499 | 37627    | 0.10   | 3876    |
| 5 | 22.904 | 82488    | 0.22   | 6670    |
| 6 | 23.774 | 36457192 | 98.16  | 4214363 |
| 7 | 25.997 | 67127    | 0.18   | 8156    |
| 8 | 28.959 | 309113   | 0.83   | 37863   |

### HPLC of compound 27

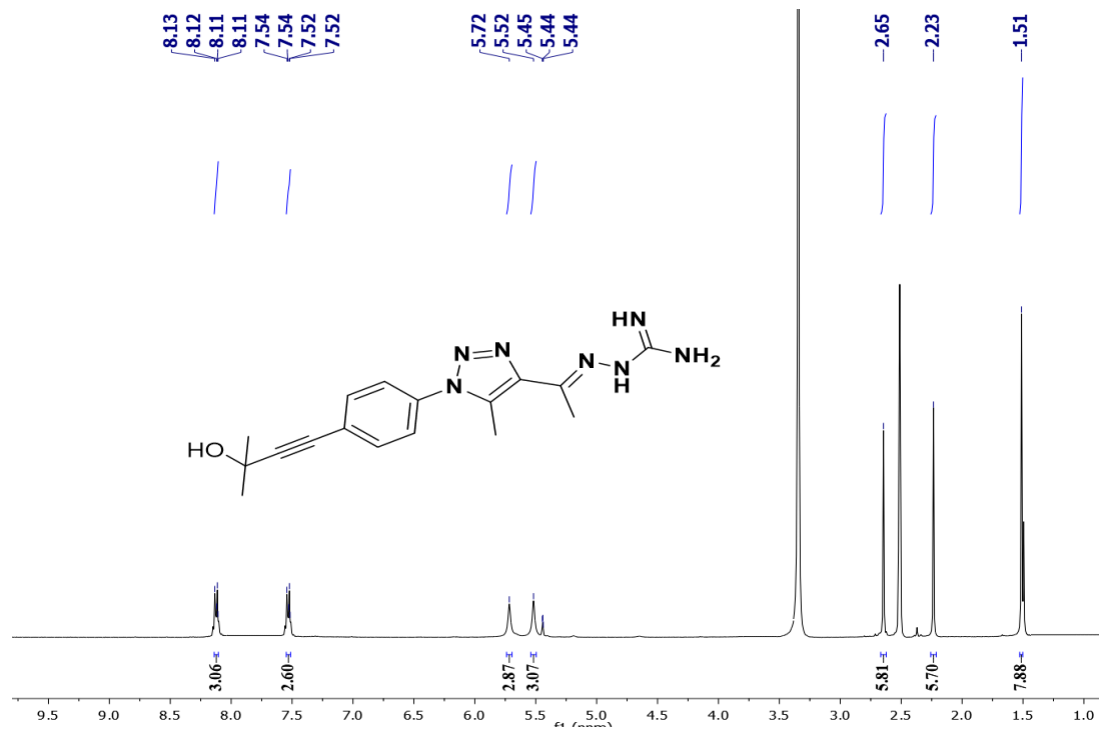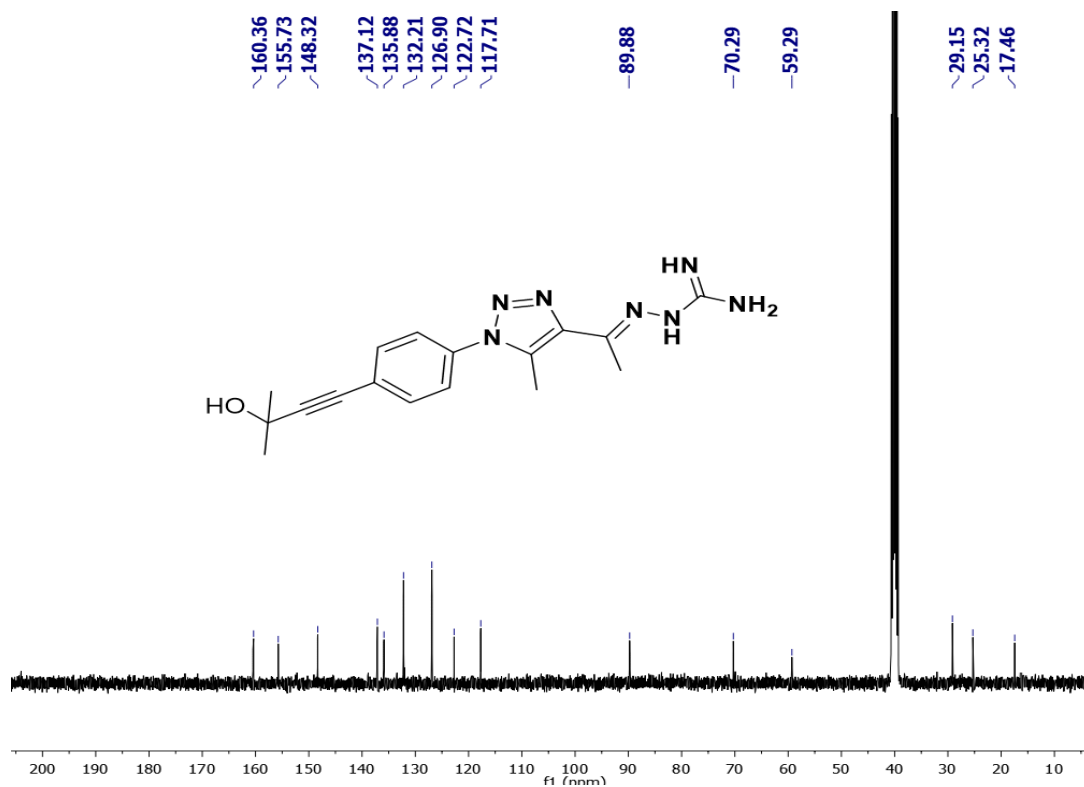

### SAMPLE INFORMATION

|                   |                            |                     |                                  |
|-------------------|----------------------------|---------------------|----------------------------------|
| Sample Name:      | 3SN-5                      | Acquired By:        | System                           |
| Sample Type:      | Unknown                    | Sample Set Name:    | dsrtrr                           |
| Vial:             | 39                         | Acq. Method Set:    | Trial 1 gradient                 |
| Injection #:      | 1                          | Processing Method:  | Default                          |
| Injection Volume: | 10.00 ul                   | Channel Name:       | 380.0nm                          |
| Run Time:         | 40.0 Minutes               | Proc. Chnl. Descr.: | W2996 PDA 380.0 nm (PDA 210.0 to |
| Date Acquired:    | 9/23/2021 7:48:13 PM EEST  |                     |                                  |
| Date Processed:   | 9/25/2021 10:20:36 AM EEST |                     |                                  |

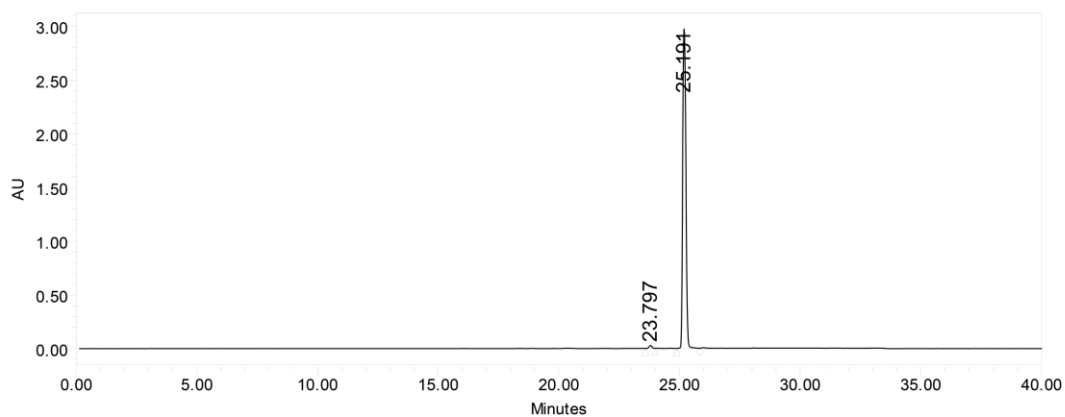

|   | RT     | Area     | % Area | Height  |
|---|--------|----------|--------|---------|
| 1 | 23.797 | 216931   | 0.79   | 26969   |
| 2 | 25.191 | 27288792 | 99.21  | 2992930 |

### HPLC of compound 28

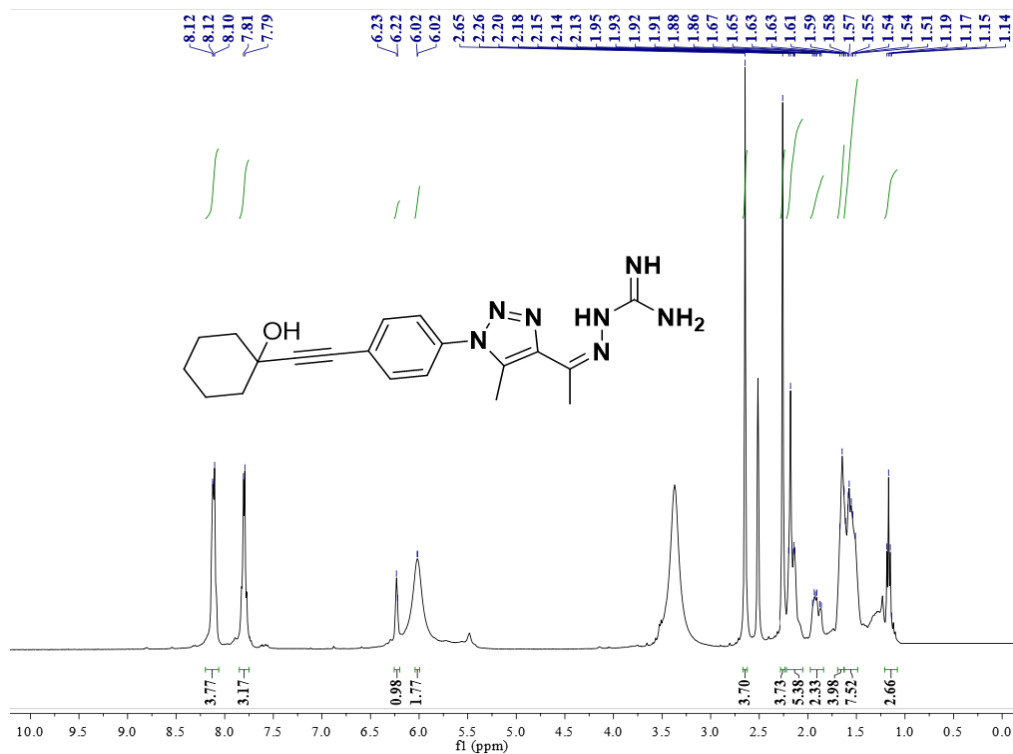

**<sup>1</sup>H NMR of compound 29**

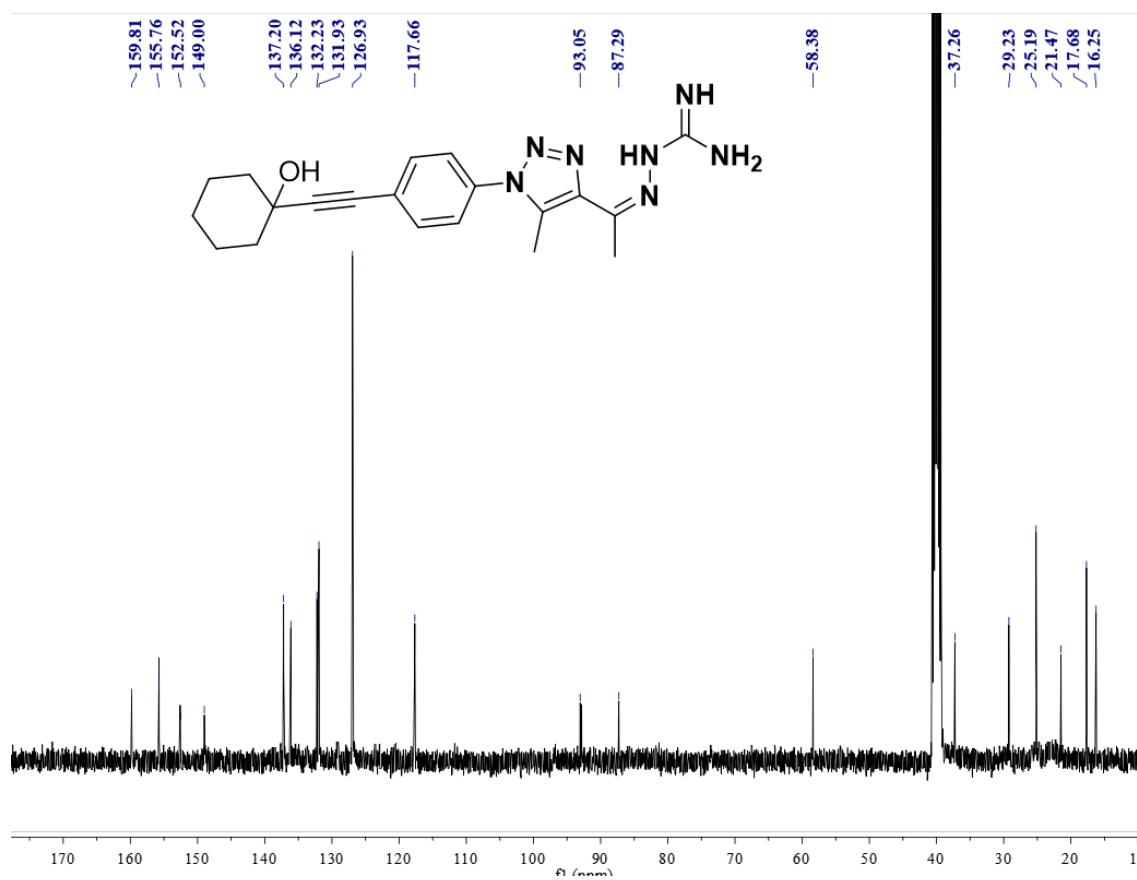

**<sup>13</sup>C NMR of compound 29**



## SAMPLE INFORMATION

|                                            |                                                      |
|--------------------------------------------|------------------------------------------------------|
| Sample Name: SN-3                          | Acquired By: System                                  |
| Sample Type: Unknown                       | Sample Set Name: dsrtrr                              |
| Vial: 41                                   | Acq. Method Set: Trial 1 gradient                    |
| Injection #: 1                             | Processing Method: Default                           |
| Injection Volume: 10.00 ul                 | Channel Name: 380.0nm                                |
| Run Time: 40.0 Minutes                     | Proc. Chnl. Descr.: W2996 PDA 380.0 nm (PDA 210.0 tc |
| Date Acquired: 9/23/2021 9:10:13 PM EEST   |                                                      |
| Date Processed: 9/25/2021 10:21:44 AM EEST |                                                      |

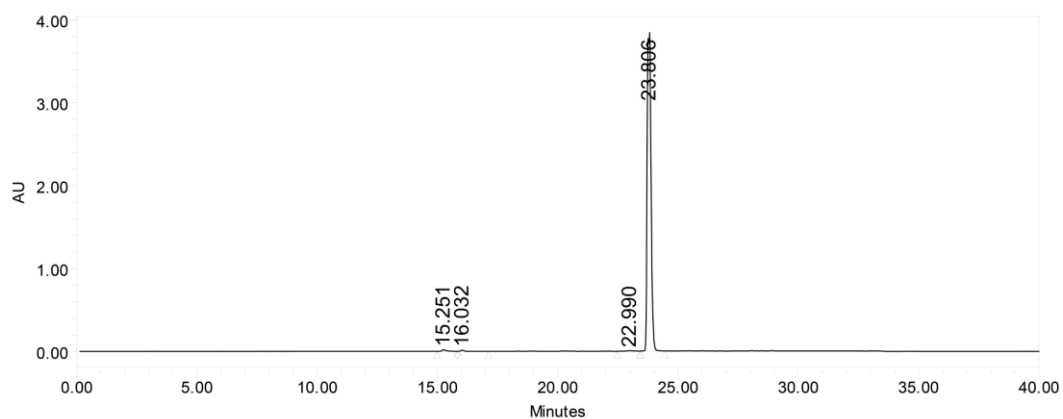

|   | RT     | Area     | % Area | Height  |
|---|--------|----------|--------|---------|
| 1 | 15.251 | 212107   | 0.49   | 17149   |
| 2 | 16.032 | 135351   | 0.31   | 14260   |
| 3 | 22.990 | 84749    | 0.19   | 5648    |
| 4 | 23.806 | 43255800 | 99.01  | 3841452 |

### HPLC of compound 29

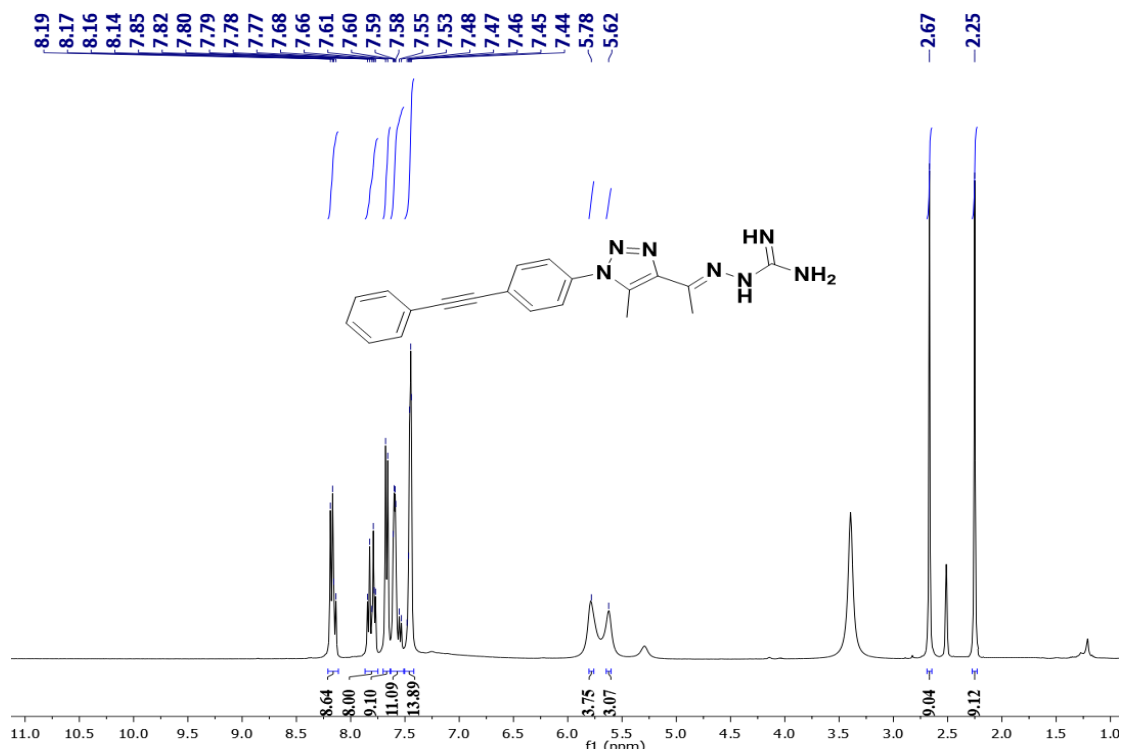

<sup>1</sup>H NMR of compound 30

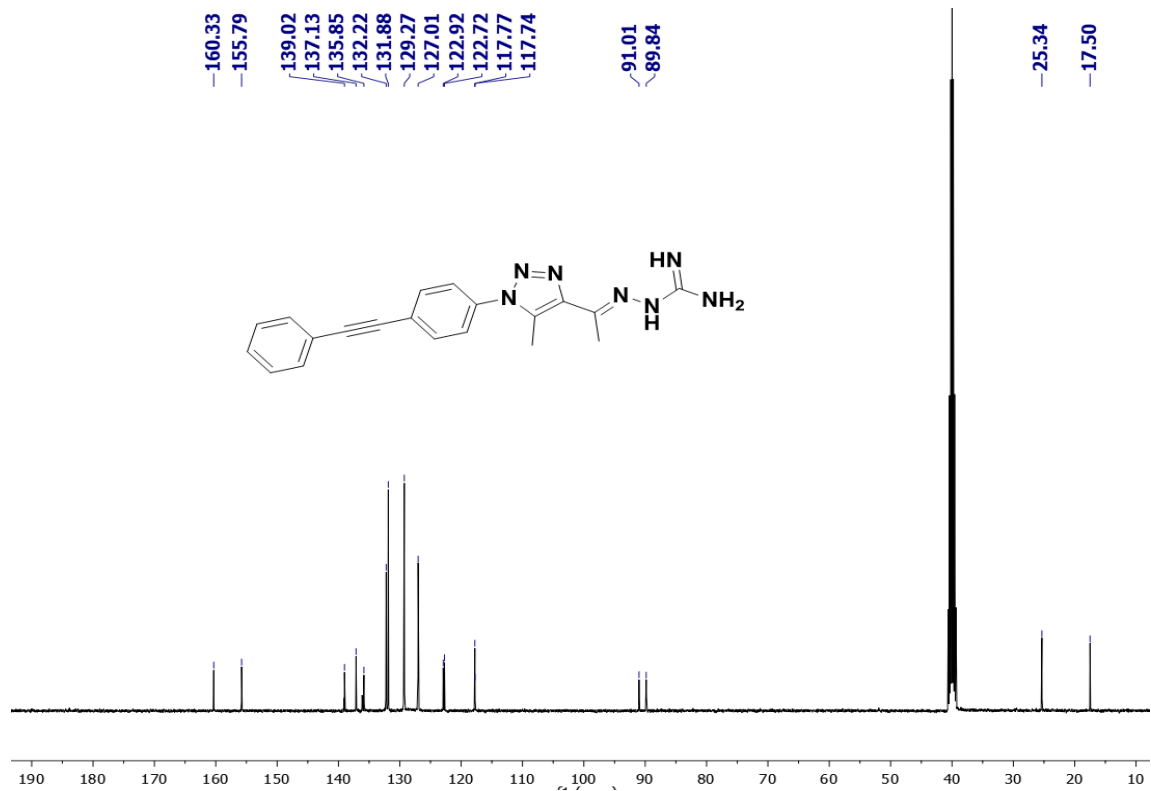

<sup>13</sup>C NMR of compound 30

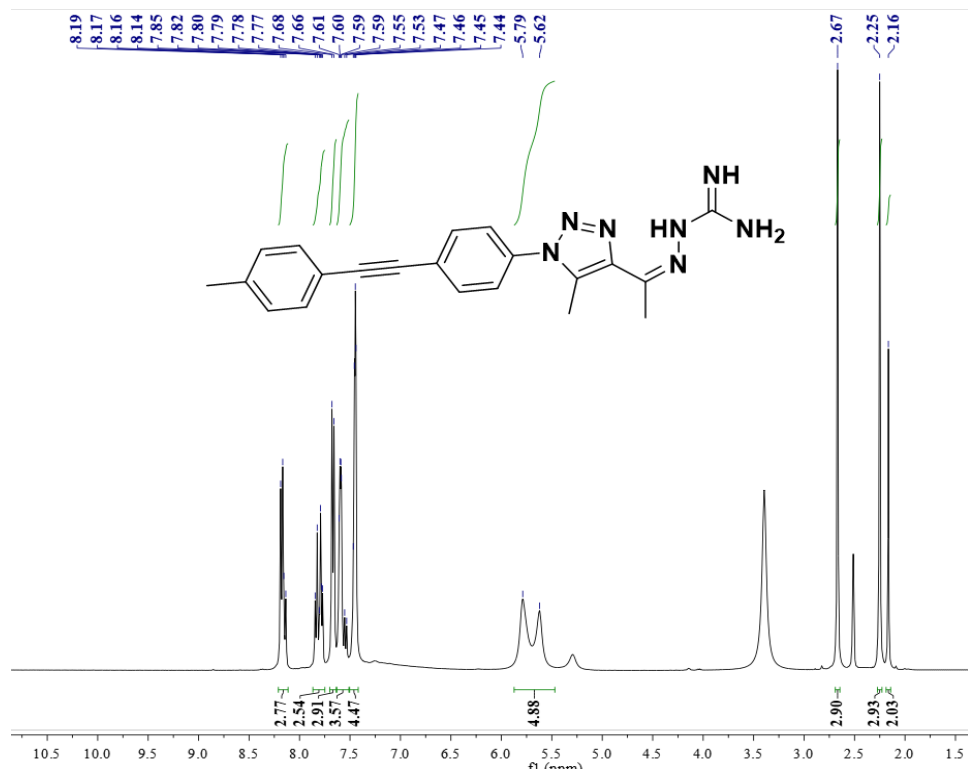

<sup>1</sup>H NMR of compound 31

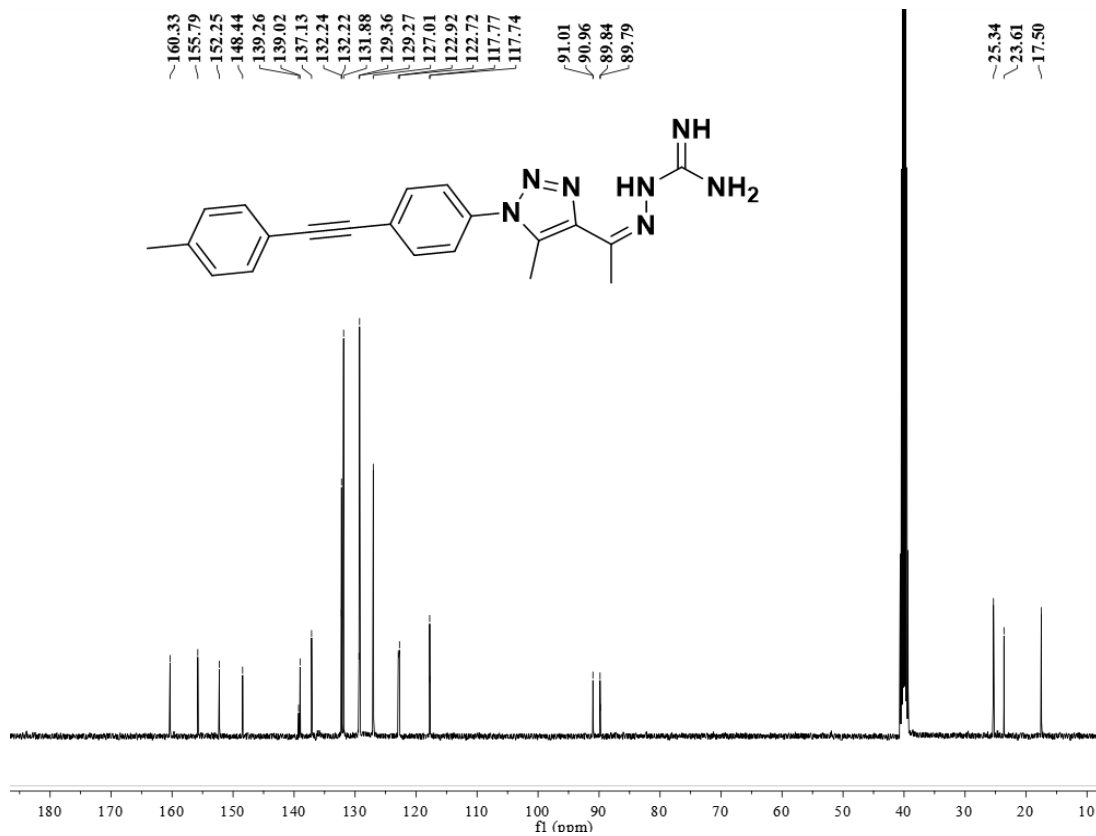

<sup>13</sup>C NMR of compound 31

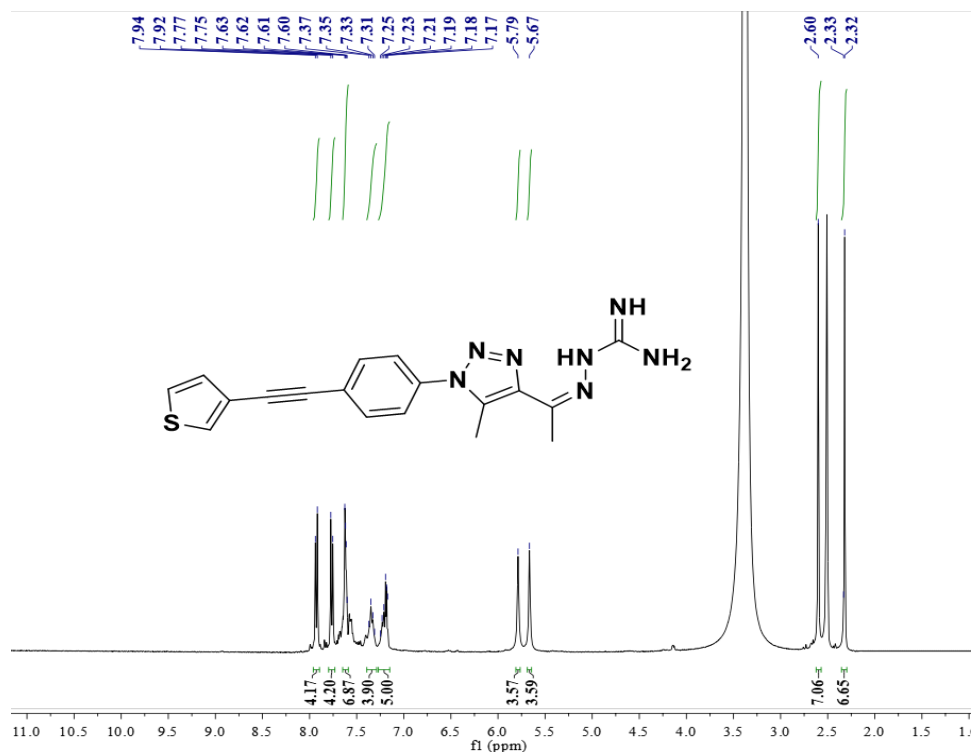

<sup>1</sup>H NMR of compound 32

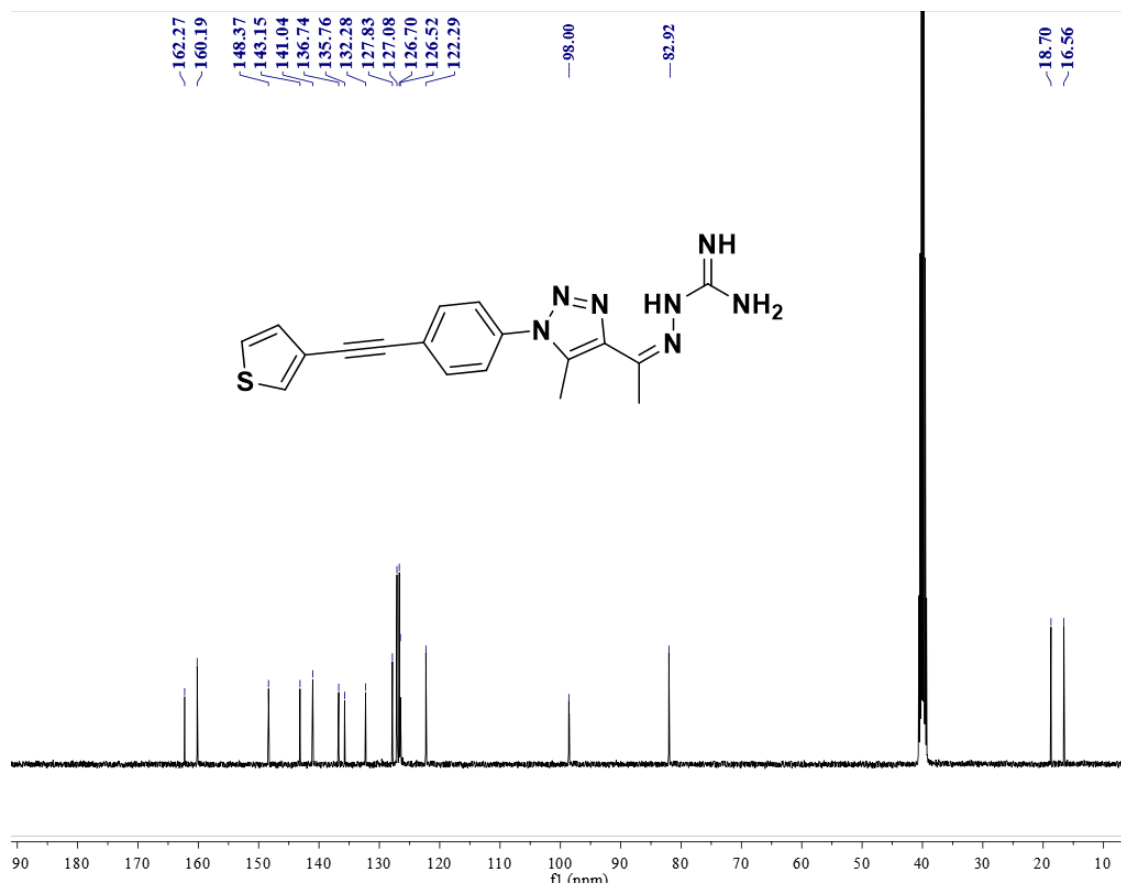

<sup>13</sup>C NMR of compound 32
